# Supplementary material for: Efficient visible-light-driven selective oxygen reduction to hydrogen peroxide by oxygen-enriched graphitic carbon nitride polymers
Source: Royal Society of Chemistry journal article supplement (doi:10.1039/c8ee01316k), 2018-01-01
Supplement: c8ee01316k1.pdf [file c8ee01316k1.pdf]

## Electronic Supplementary Information

### **Efficient visible-light-driven selective oxygen reduction to hydrogen peroxide by oxygen-enriched graphitic carbon nitride polymers**

*Zhen Wei<sup>a</sup>, Meili Liu<sup>b</sup>, Zijian Zhang<sup>a</sup>, Wenqing Yao<sup>a</sup>, Hongwei Tan<sup>b</sup> and Yongfa Zhu<sup>a\*</sup>*

<sup>a</sup> Department of Chemistry, Tsinghua University, Beijing 100084, P. R. China

<sup>b</sup> College of Chemistry, Beijing Normal University, Beijing, 100875, P. R. China.

Corresponding author:

Yongfa Zhu; Address: Department of Chemistry, Tsinghua University, Beijing, 100084, China;  
Email: zhuyf@tsinghua.edu.cn; Tel.: (+86)10-6278-7601; Fax: (+86)10-6278-7601.

## Experimental section

### Synthesis

50 mmol of dicyandiamide and 0.5 mmol of ammonium paratungstate were thoroughly ground in a mortar and mixed well, then transferred to a lidded crucible, then they were calcined in a corundum crucible at 400, 450, 475, 500, 525, 550°C for 4 h. After cooling to room temperature, the product was obtained. Marked as **OCN-400, 450, 475, 500, 525, 550**, respectively.

**g-C<sub>3</sub>N<sub>4</sub>**: Dicyandiamide calcined alone at 500 for 4 h, labelled as **g-C<sub>3</sub>N<sub>4</sub>**, as a reference sample.

**WO<sub>3</sub>**: Ammonium paratungstate calcined alone at 500 for 4 h, labelled as **WO<sub>3</sub>**, as a tungsten oxide reference sample.

### Samples characterizations

The morphologies and structures of materials were measured by TEM operated on Hitachi HT 7700 at 100 kV. Details morphologies were observed by HAADF-STEM-EDX on the JEM-2100F field emission high-resolution transmission electron microscope at 200 kV with high angle annular dark-field STEM. Field emission scanning electron microscopy (FESEM) was observed on a Hitachi SU-8010 at 10 kV. Atomic force microscopy (AFM) measurements were carried out by using a SPM-9700 scanning probe microscope (Shimadzu Corporation). The samples for AFM measurements were prepared by spraying a diluted suspension of the sample on a freshly cleaved mica surface and then dried in air. Powder X-ray diffraction (XRD) was measured on Rigaku D/max-2400 with Cu K $\alpha$ 1 ( $\lambda$ = 1.5418 Å) radiation at 40 kV and 200 mA. The Brunauer–Emmett–Teller (BET) surface area measurements were

performed by using a micromeritics (ASAP 2010 V5.02H) surface area analyzer. The nitrogen adsorption and desorption isotherms were measured at 77 K after degassing the samples on a Sorptomatic 1900 Carlo Erba Instrument. The UV–visible diffuse reflectance spectroscopy (DRS) of materials were carried out on Hitachi U-3010 spectrophotometer using BaSO<sub>4</sub> as a reference. Fourier transform infrared spectra (FT-IR) were taken on Bruker VERTEX-70 spectrometer from 4000 cm<sup>-1</sup> to 600 cm<sup>-1</sup> with the resolution of 1 cm<sup>-1</sup>. The room temperature photoluminescence (PL) spectra of materials were recorded on Perkin-Elmer LS55 spectrophotometer. X-ray photoelectron spectroscopy (XPS) was measured on a PHI Quantera SXM spectrometer using Al K $\alpha$  radiation. In situ electron paramagnetic resonance (EPR) measurement was taken on an Endor spectrometer (JEOL ES-ED3X) at 103 K in liquid nitrogen. The g factor was obtained by taking the signal of manganese as a standard. Solid state NMR for <sup>13</sup>C magic angle spinning (MAS) measurements were carried out on JNM-ECZ600R solid-state NMR with the probe diameter 3.2 mm, 12kHz rotating speed and 2s relaxation time.

### **Electrochemical and photoelectrochemical measurements**

The photoelectrochemical properties were evaluated in a conventional three-electrode cell system on CHI 660E (Shanghai, Chenhua) electrochemical workstation. ITO/product sample as the working electrode, a saturated calomel electrode (SCE) as the reference electrode and a Pt wire used as the counter electrode. 0.1M Na<sub>2</sub>SO<sub>4</sub> aqueous solution was used as the electrolyte. To remove the dissolved oxygen, N<sub>2</sub> was

bubbled into the Na<sub>2</sub>SO<sub>4</sub> aqueous solution for 30 minutes before measurement. The working electrode was irradiated by a 300 W Xe lamp (Institute for Electric Light Sources, Beijing) and the light intensity was about 100 mW·cm<sup>-2</sup>.

### **Rotating disk electrode (RDE) measurements**

The measurements were performed on a Pine AFMSRXE 1523 advanced electrochemical system with a three-electrode cell using an Ag/AgCl electrode and a Pt wire electrode as the reference and counter electrode, respectively<sup>1</sup>. The working electrode was prepared as follows: catalysts (50 mg) were dispersed in EtOH (2 ml) containing Nafion (50 mg) by ultrasonication. The slurry (20 μl) was put onto a Pt disk electrode and dried at room temperature. The linear sweep voltammogram (LSV) were obtained in an O<sub>2</sub>-saturated 0.1 M phosphate buffer solution (pH 7) with a scan rate 10 mV s<sup>-1</sup> after O<sub>2</sub> bubbling for 5 min. The average number of electrons (n) involved in the overall O<sub>2</sub> reduction was determined by the slopes of the Koutecky–Levich plots with the following equation:

$$j^{-1} = j_k^{-1} + B^{-1}\omega^{-1/2}$$

$$B = 0.2nF\nu^{-1/6}CD^{2/3}$$

j is the current density, j<sub>k</sub> is the kinetic current density, ω is the rotating speed (rpm), F is the Faraday constant (96485 C mol<sup>-1</sup>), ν is the kinetic viscosity of water (0.01 cm<sup>2</sup> s<sup>-1</sup>), C is the bulk concentration of O<sub>2</sub> in water (1.26×10<sup>-3</sup> mol cm<sup>-3</sup>), and D is the diffusion coefficient of O<sub>2</sub> (2.7×10<sup>-5</sup> cm<sup>2</sup> s<sup>-1</sup>), respectively.

### **Transient photovoltage (TPV) measurements**

TPV measurements were carried out to study the kinetic features of the photogenerated charges with a 355 nm laser pulse from a third-harmonic Nd:YAG laser.<sup>2,3</sup> TPV measurements were carried out on a home-made system in air atmosphere at room temperature. The samples were excited with a laser radiation pulse with the wavelength of 355 nm and pulse width of 5 ns from a third-harmonic Nd:YAG laser (Polaris II, New Wave Research, Inc.). Moreover, The TPV signal was recorded with a 500 MHz digital phosphor oscilloscope (TDS 5054, Tektronix).

### **Photocatalytic reduction of oxygen to hydrogen peroxide**

The photocatalytic reduction of  $O_2$  to  $H_2O_2$  was analyzed according to the literature with a slight modification<sup>4,5</sup>. 50 mg of photocatalyst suspended in 50 mL of water (or isopropanol: 5mL and water: 45 mL) was placed Pyrex test tube. The suspension solutions were first ultrasonically dispersed for 30 min in the dark and then stirred for 30 min before irradiation to reach the absorption–desorption equilibrium. The light source was provided by a Xe lamp at 300 W with 420 nm cutoff filter. The average light intensity was  $35.2 \text{ mW}\cdot\text{cm}^{-2}$ . At certain time intervals, 3 mL solution was sampled and centrifuged to remove the photocatalysts, and then filtrated with a  $0.45 \mu\text{m}$  Millipore filter to remove the photocatalyst. The reactions were carried out in the air atmosphere without special instructions. If compare the different atmospheres, it need to bubble  $N_2$  or  $O_2$  into the suspension solutions for 30 min before measurement. Keep the temperature at 298 K during all reactions.

The apparent quantum yields for H<sub>2</sub>O<sub>2</sub> formation was determined using the equation: AQY (%) = ([H<sub>2</sub>O<sub>2</sub> formed (mol)] × 2)/[photon number entered into the reaction vessel (mol)] × 100.

The amount of H<sub>2</sub>O<sub>2</sub> was analyzed by iodometry.<sup>6</sup> 1 mL of 0.1 mol·L<sup>-1</sup> potassium hydrogen phthalate (C<sub>8</sub>H<sub>5</sub>KO<sub>4</sub>) aqueous solution and 1 mL of 0.4 mol·L<sup>-1</sup> potassium iodide (KI) aqueous solution were added to obtained solution, which was then kept for 30 min. The H<sub>2</sub>O<sub>2</sub> molecules reacted with iodide anions (I<sup>-</sup>) under acidic conditions (H<sub>2</sub>O<sub>2</sub> + 3I<sup>-</sup> + 2H<sup>+</sup> → I<sub>3</sub><sup>-</sup> + 2H<sub>2</sub>O) to produce triiodide anions (I<sub>3</sub><sup>-</sup>) possessing a strong absorption at around 350 nm. The amount of I<sub>3</sub><sup>-</sup> was determined by means of UV-vis spectroscopy on the basis of the absorbance at 350 nm, from which the amount of H<sub>2</sub>O<sub>2</sub> produced during each reaction was estimated.

### **Photocatalytic H<sub>2</sub> evaluation**

The photocatalytic activities of the as-prepared samples were evaluated by using a Perfect Light agitated reactor (LabSolar-III AG). A visible light source was obtained by using a 300 W Xe lamp with a 420 nm cut-off filter. 50 mg photocatalyst was added into 100 mL solution (90 mL deionized water and 10 mL triethanolamine as sacrificial agent). Before light irradiation, the suspensions were first ultrasonically dispersed in the dark for 30 min. At given time intervals (1 h), a certain amount of gas was taken from the reactor for gas concentration analysis using an online gas chromatograph (GC-7800) with a thermal conductivity detector (TCD) and using N<sub>2</sub> as carrier gas. Product gases were calibrated with standard H<sub>2</sub> gas and their identities were determined according to the retention time.

### **Photocatalytic degradation evaluation**

The photocatalytic activity of the samples were evaluated by the photodegradation efficiency of phenol and 2,4-DCP solution under the irradiation of visible light. The light source was provided by a Xe lamp at 300 W with 420 nm cutoff filter. The average light intensity was  $22 \text{ mW}\cdot\text{cm}^{-2}$ . The photodegradation reactions were measured in the quartz tube reactors with 20mg as-prepared photocatalysts powders and 50 mL phenol or 2,4-DCP solution with a concentration of 5 ppm. The suspension solutions were first ultrasonically dispersed for 30 min in the dark and then stirred for 30 min before irradiation to reach the absorption–desorption equilibrium. At certain time intervals, 3 mL solution was sampled and centrifuged to remove the photocatalysts, and then filtrated with a  $0.45 \text{ }\mu\text{m}$  Millipore filter to remove the photocatalyst. The concentration of phenol and 2,4-DCP was analyzed by using the HPLC system (Shimadzu LC-20AT) with a C18 reversed phase column and an UV absorbance detector (K 2501). The determination wavelength was 270 nm (phenol) or 284 nm (2,4-DCP). The mobile phase was  $\text{CH}_3\text{OH}$  and  $\text{H}_2\text{O}$  (volume ratio: 60:40 (phenol) or 75/25 (2,4-DCP)) with a flow rate of 1 mL/min.

### **Theoretical calculations**

Geometry optimizations for all structures were carried out by using the DFT functional B3LYP with 6-31G (d) basis sets. Frequence calculations were done to confirm the stationary points at the same level. High accuary energies were calculated by using the PBE0 functional with 6-311G(d) basis sets. All calculations were performed using the

Gaussian09 program. For the species C, all the possible spin states were canvassed and computational results shows that the triplet spin state with anti-parallel spin density on the C1 and N4 atoms is the ground spin state.

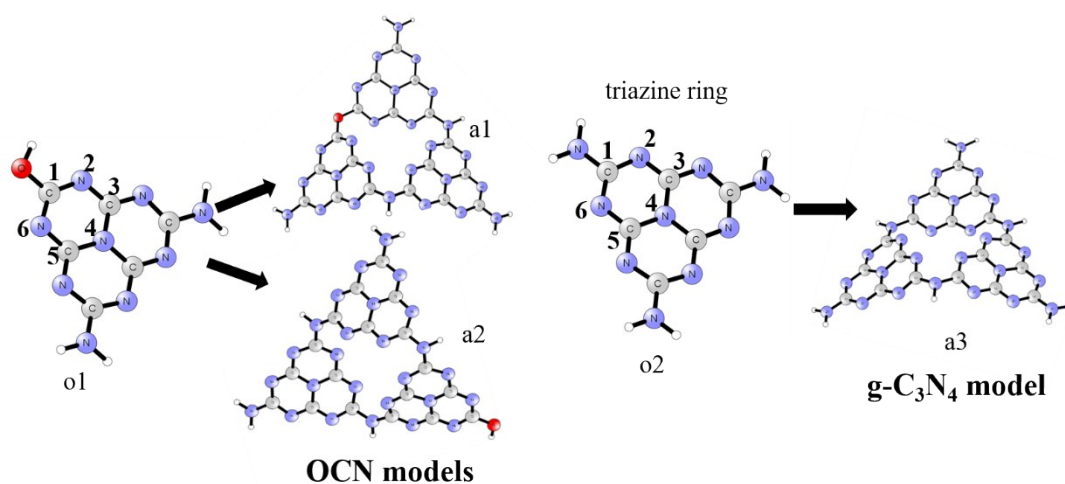

Fig. S1 The structure of OCN models (-OH and C-O-C) and g-C<sub>3</sub>N<sub>4</sub> model.

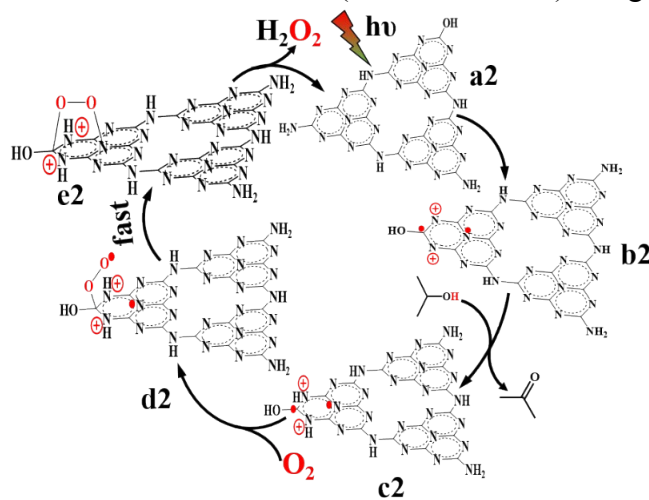

Fig. S2 The mechanism of OCN model (-OH) photocatalytic O<sub>2</sub> reduction to synthesis H<sub>2</sub>O<sub>2</sub>.

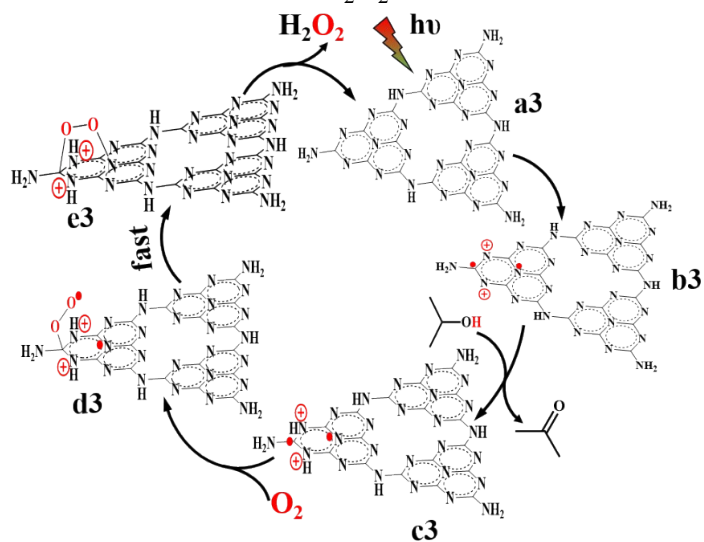

Fig. S3 The mechanism of g-C<sub>3</sub>N<sub>4</sub> (-NH<sub>2</sub>) photocatalytic O<sub>2</sub> reduction to synthesis H<sub>2</sub>O<sub>2</sub>.

Table S1. The energy of b→c

| □                    | b         | c         | acetone  | isopropanol | ΔE (kcal/mol) |
|----------------------|-----------|-----------|----------|-------------|---------------|
| 1(C-O-C)             | 2187.6877 | 2188.8810 | 192.9783 | 194.1782    | 4.2           |
| 2(-OH)               | 2187.7019 | 2188.8772 |          |             | 15.5          |
| 3(-NH <sub>2</sub> ) | 2167.8512 | 2169.0256 |          |             | 16.0          |

$$\Delta E(b \rightarrow c) = E(c) + E(\text{acetone}) - E(b) - E(\text{isopropanol})$$

Table S2. The energy of e→a

|                      | e          | a          | H <sub>2</sub> O <sub>2</sub> | ΔE (kcal/mol) |
|----------------------|------------|------------|-------------------------------|---------------|
| 1(C-O-C)             | -2339.1981 | -2187.8003 | -151.4270                     | -18.3         |
| 2(-OH)               | -2339.2344 | -2187.8117 |                               | -2.7          |
| 3(-NH <sub>2</sub> ) | -2319.3767 | -2167.9620 |                               | -7.8          |

$$\Delta E(e \rightarrow a) = E(a) + E(\text{H}_2\text{O}_2) - E(e)$$

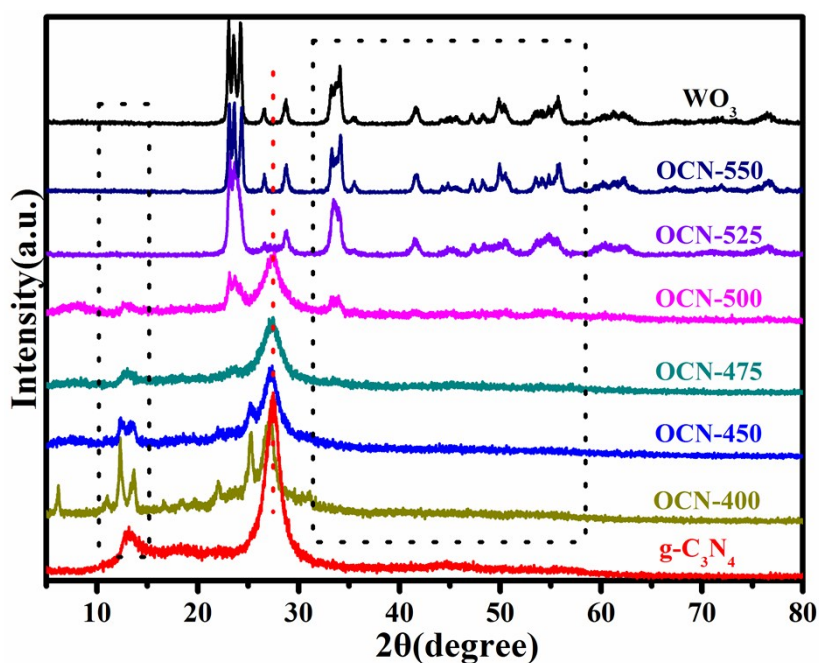

Fig. S4 XRD patterns (a) of the samples.

Table S3. The BET surface and product weight of g-C<sub>3</sub>N<sub>4</sub> and OCN samples

| Number                               | g-C <sub>3</sub> N <sub>4</sub> | OCN-400 | OCN-450 | OCN-475 | OCN-500 | OCN-525 | OCN-550 |
|--------------------------------------|---------------------------------|---------|---------|---------|---------|---------|---------|
| BET/ m <sup>2</sup> ·g <sup>-1</sup> | 5.4201                          | 8.3905  | 24.4578 | 25.4737 | 30.9021 | 29.8451 | 12.6376 |
| Product weight/g                     | 2.5560                          | 2.8876  | 1.9255  | 1.7742  | 0.9891  | 0.4451  | 0.1149  |

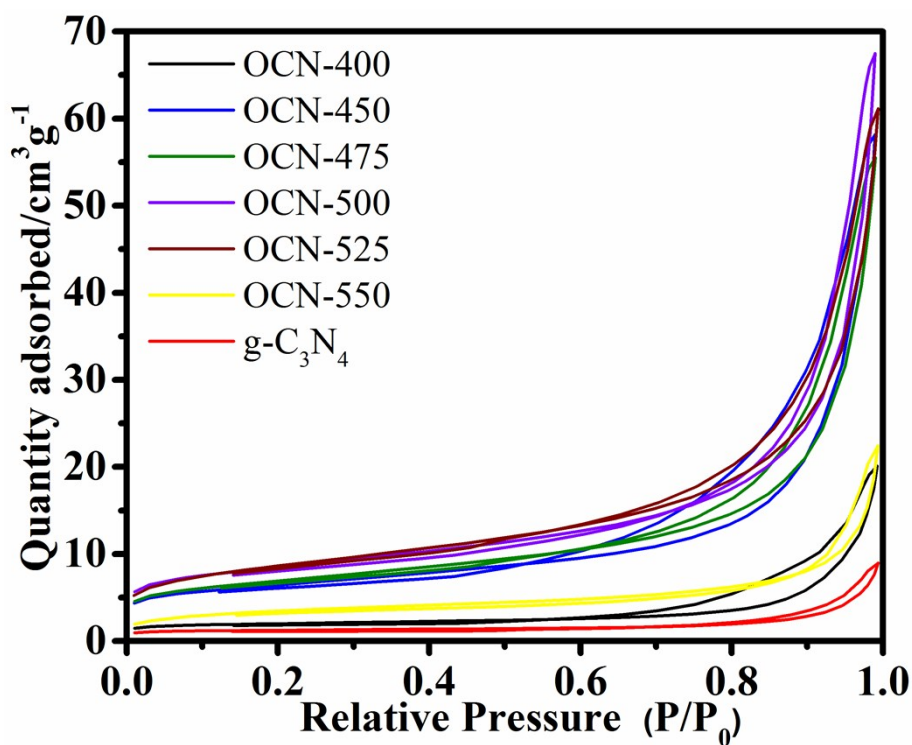

Fig. S5 N<sub>2</sub> adsorption–desorption isotherms of different samples.

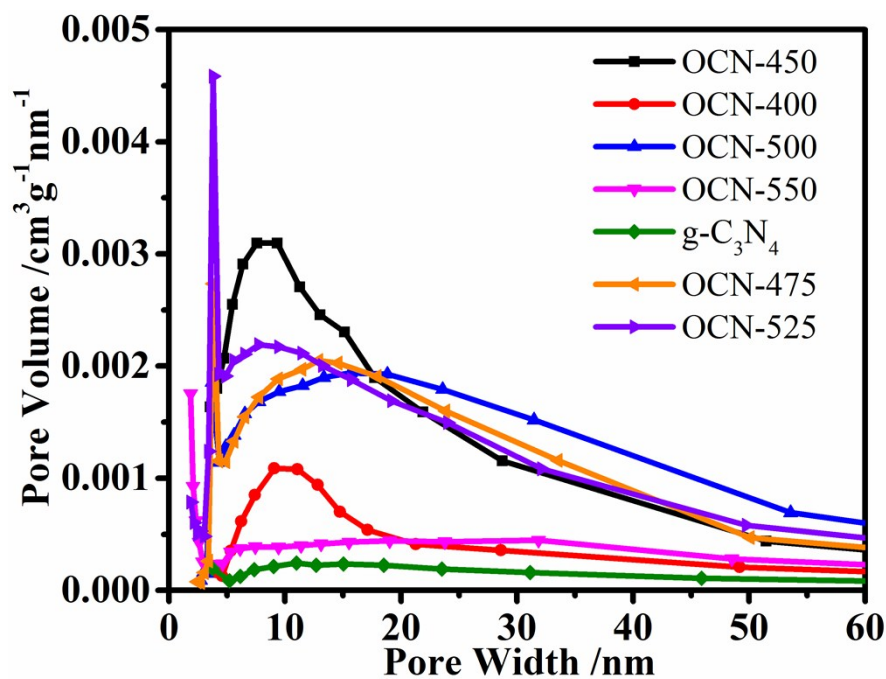

Fig. S6 BJH pore-size distribution of different samples.

Nitrogen adsorption–desorption isotherms (Figure S5) show that CW-500 exhibits a high Brunauer–Emmett–Teller (BET) surface area of 30.9021 m<sup>2</sup> g<sup>-1</sup>. The average pore diameter is about 15.64 nm (Figure S6).

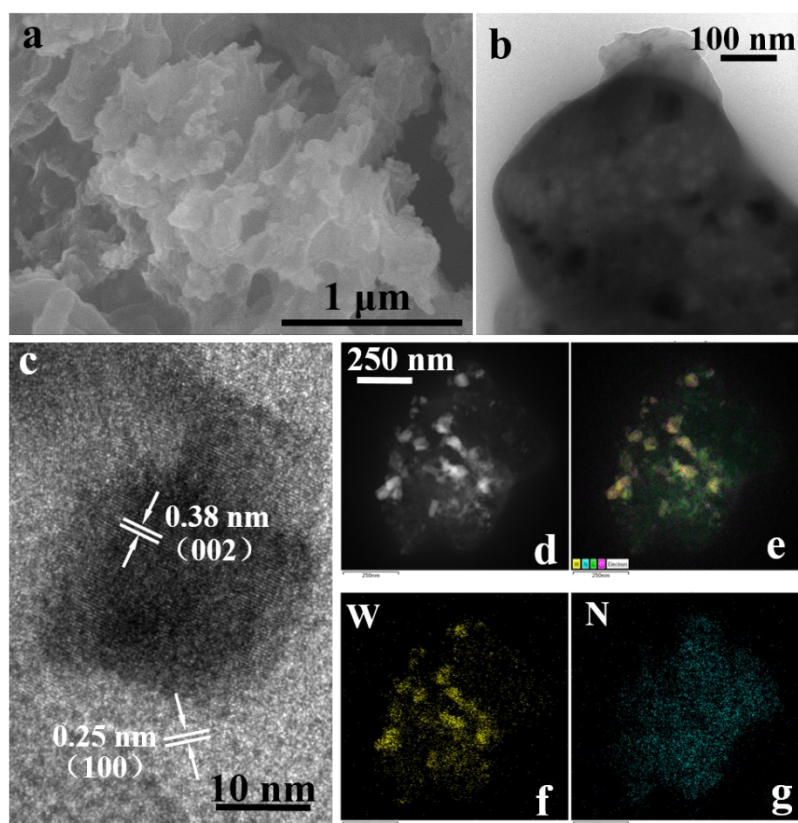

Fig. S7 (a) FE-SEM images of OCN-500; (b) TEM images of OCN-500; (c) HR-TEM images of OCN-500; (d) HAADF-STEM images of OCN-500, EDS mapping results W (f) and N (g) and overlay of HAADF-STEM of W (yellow) and N (blue) elements of OCN-500 (e).

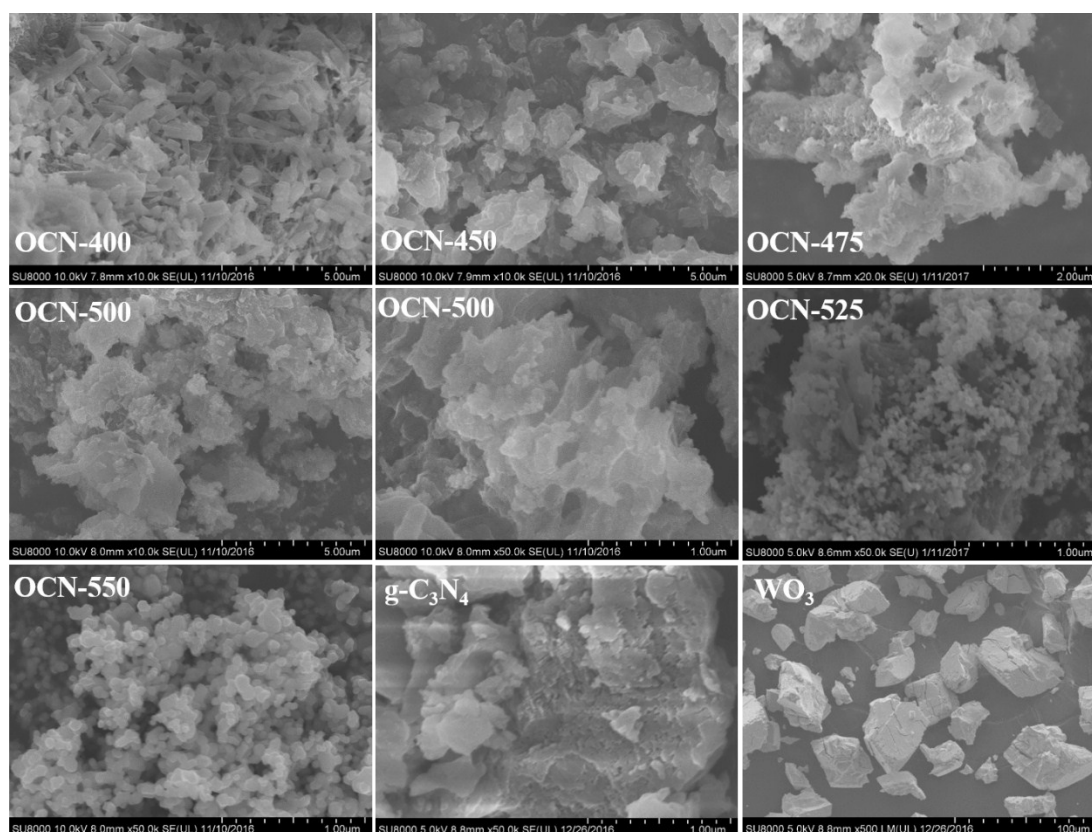

Fig. S8 FE-SEM images of different samples.

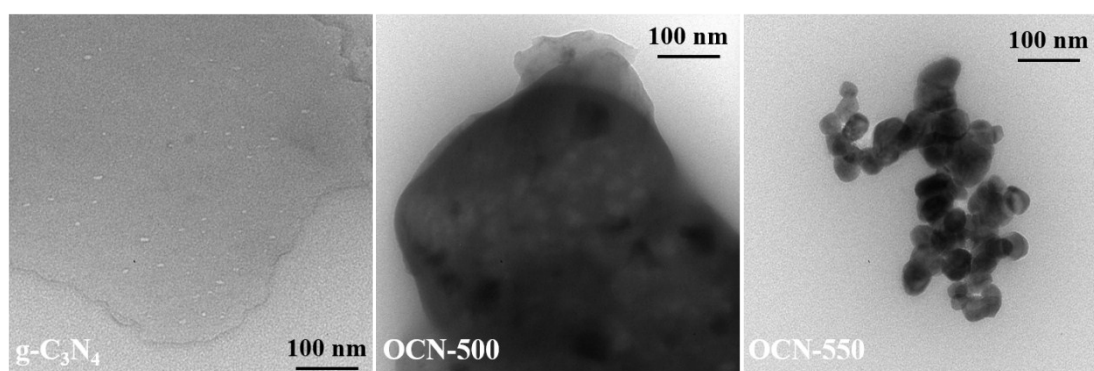

Fig. S9 TEM images of  $\text{g-C}_3\text{N}_4$ , OCN-500 and OCN-550.

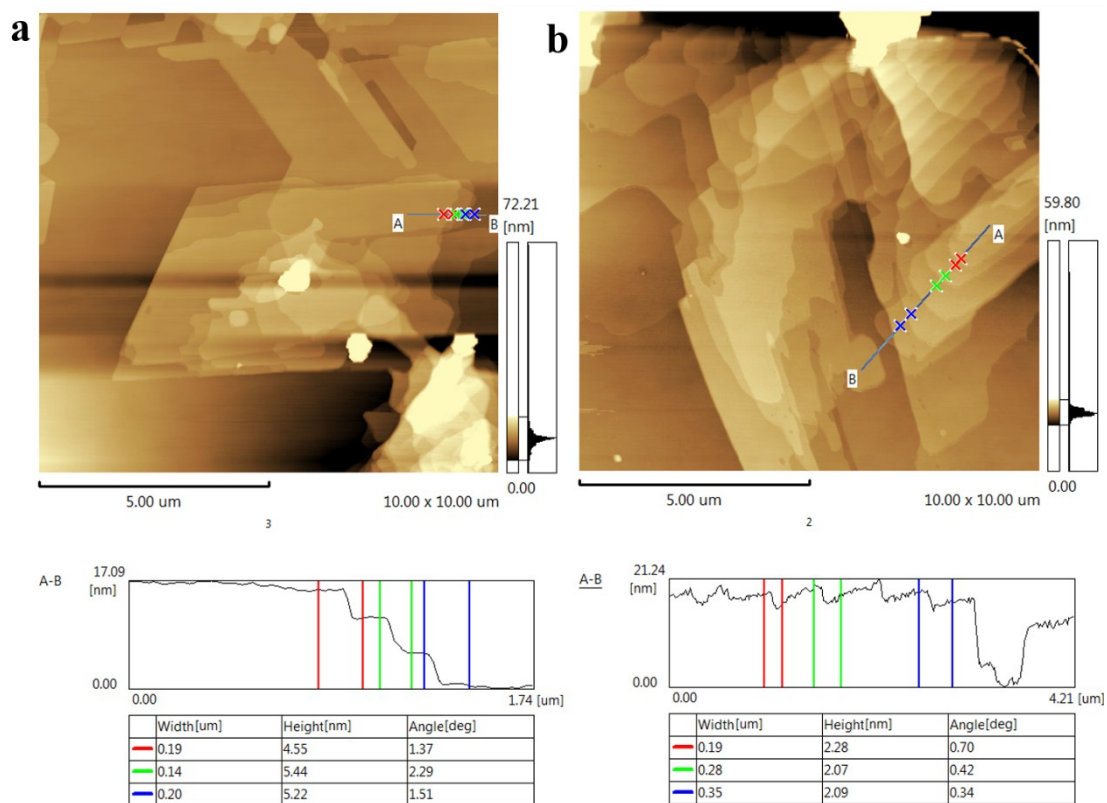

Fig. S10 AFM images of g-C<sub>3</sub>N<sub>4</sub> (a) and OCN-500 (b).

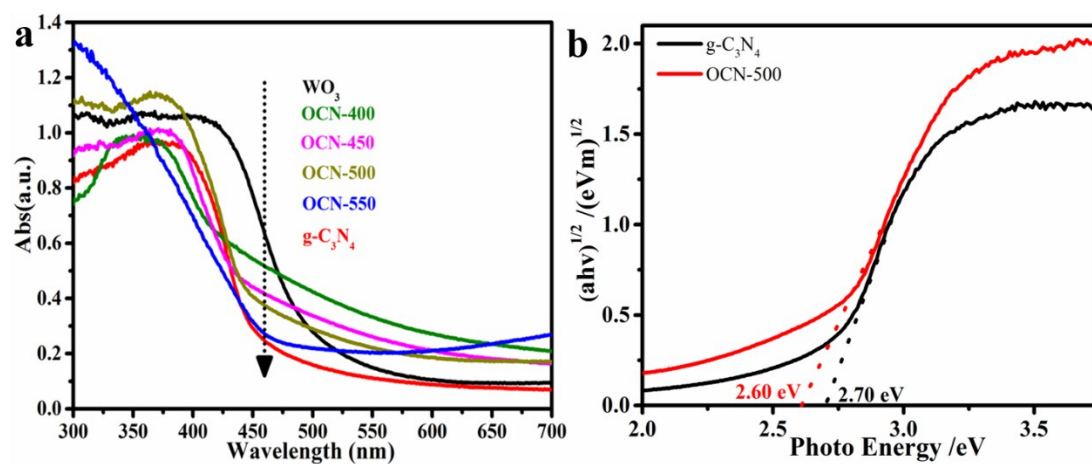

Fig. S11 (a) Diffuse reflectance absorption spectra of the samples; (b) gap energies of g-C<sub>3</sub>N<sub>4</sub> and OCN-500.

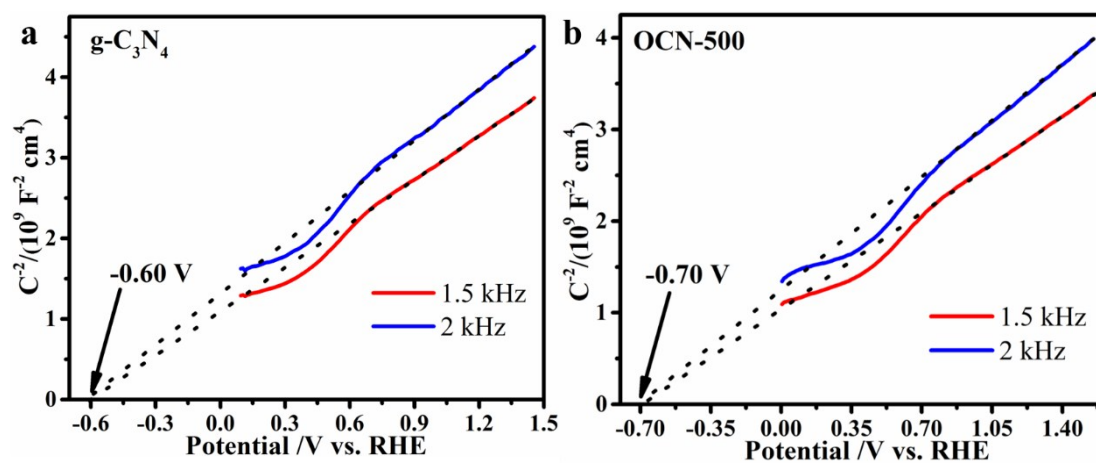

Fig. S12 Electrochemical Mott-Schottky curves of  $\text{g-C}_3\text{N}_4$  (a) and OCN-500 (b).

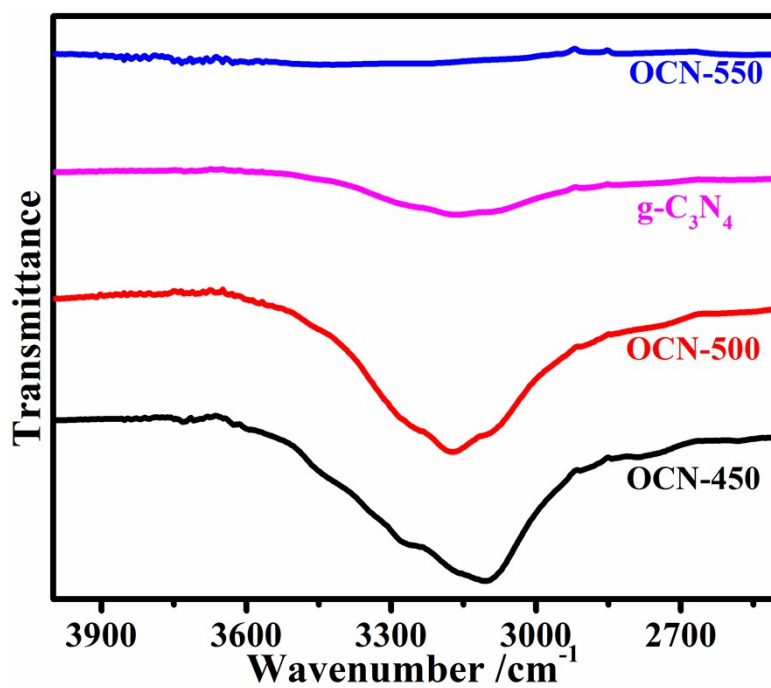

Fig. S13 FT-IR spectra of samples.

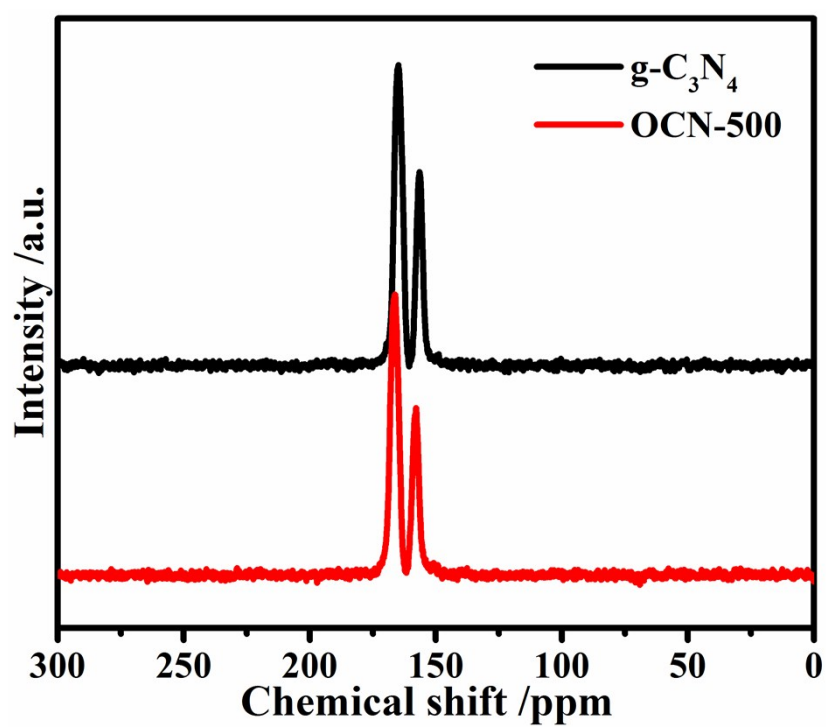

Fig. S14 Solid-state <sup>13</sup>C CP-MAS NMR of g-C<sub>3</sub>N<sub>4</sub> and OCN-500.

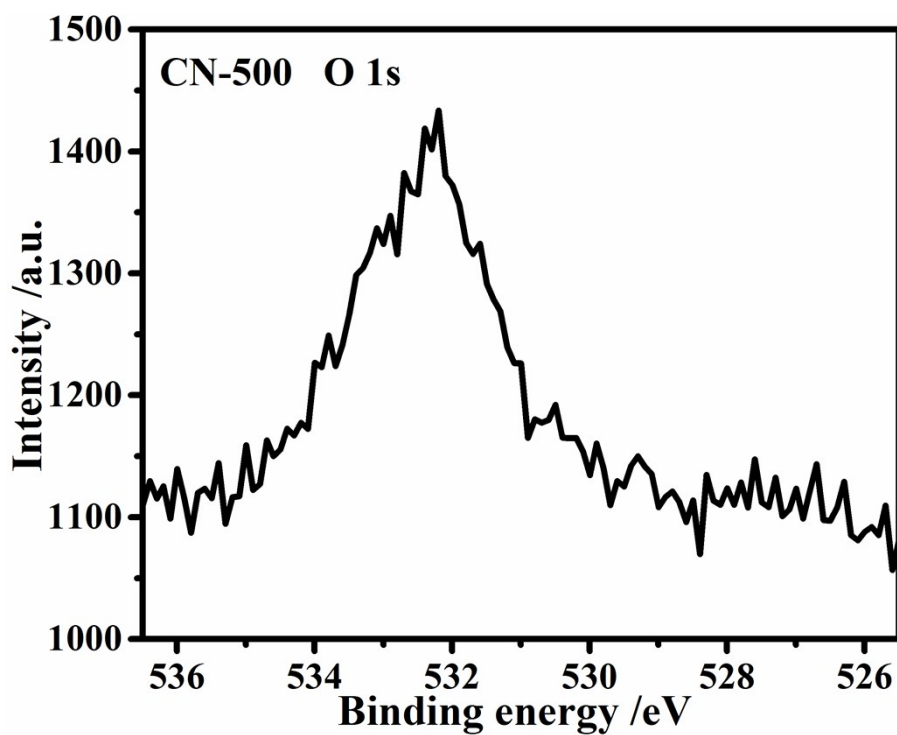

Fig. S15 O 1s high-resolution XPS spectra of g-C<sub>3</sub>N<sub>4</sub>.

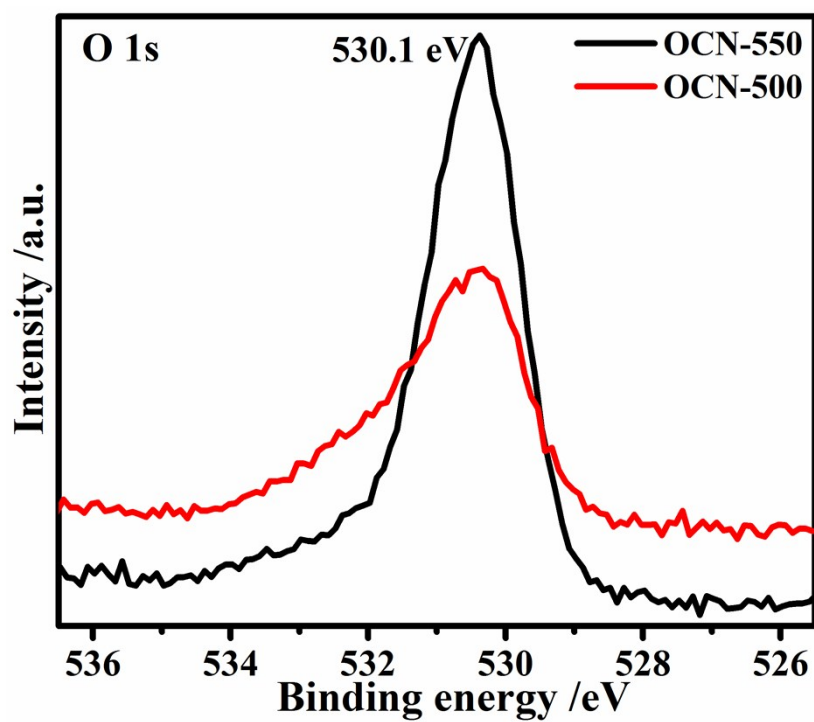

Fig. S16 O 1s high-resolution XPS spectra of OCN-500 and OCN-550.

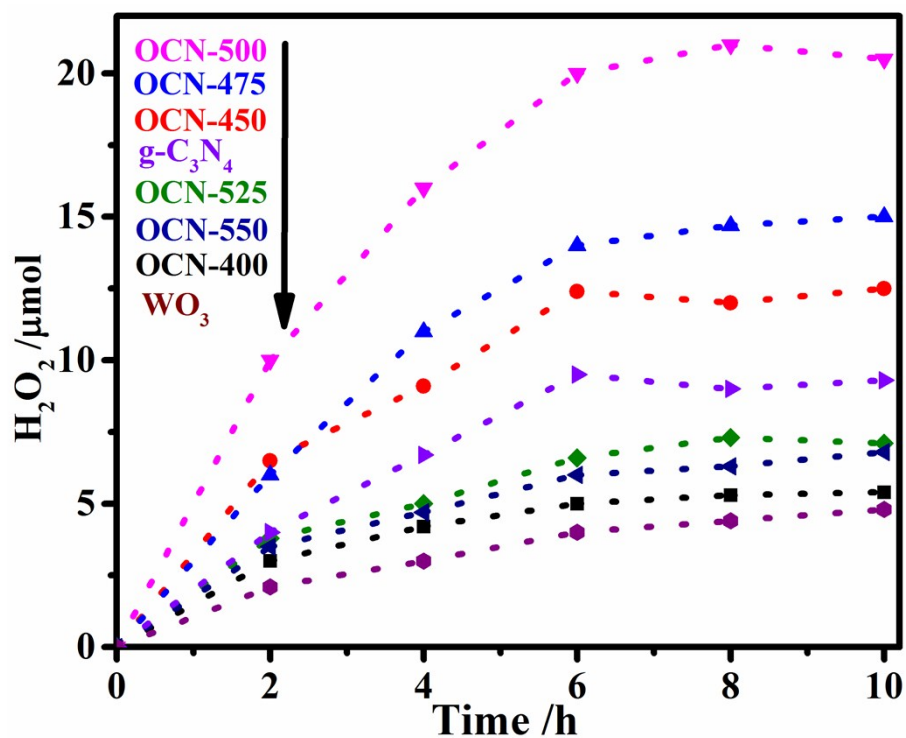

Fig. S17 The photocatalytic generation of H<sub>2</sub>O<sub>2</sub> in pure water under visible light irradiation with air atmosphere.

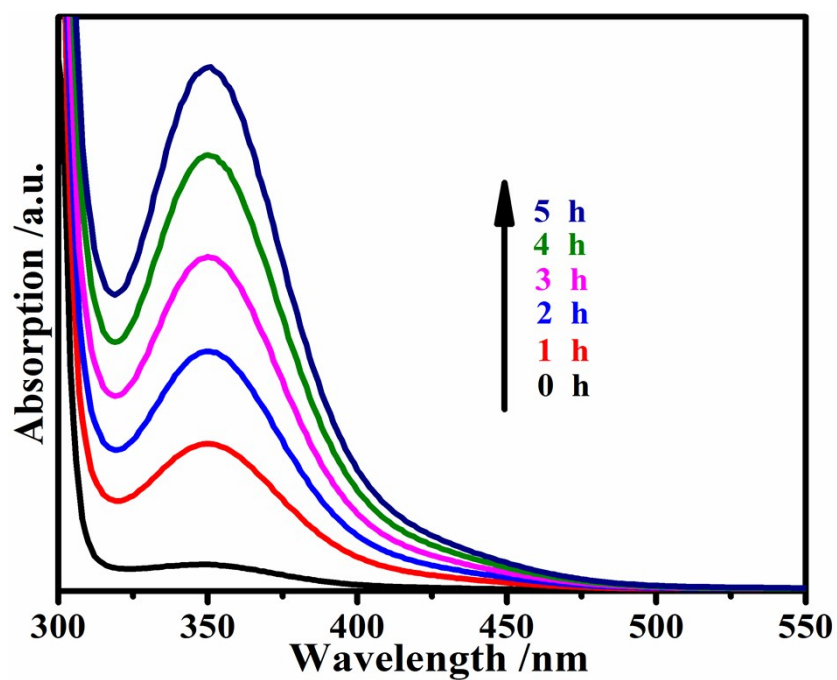

Fig. S18 UV-vis absorption spectrum changes of H<sub>2</sub>O<sub>2</sub> generation of OCN-500 in isopropyl alcohol under visible light irradiation.

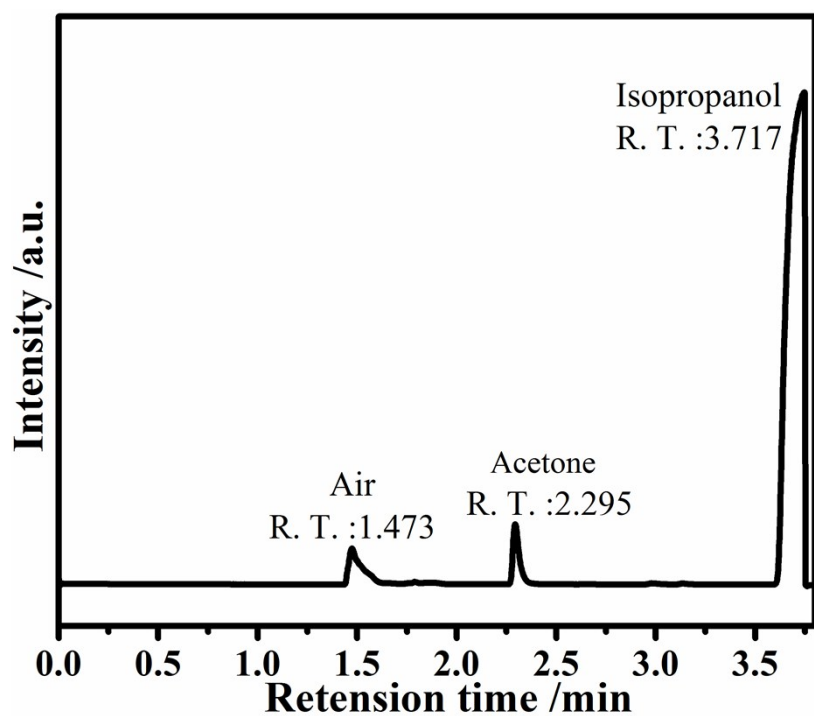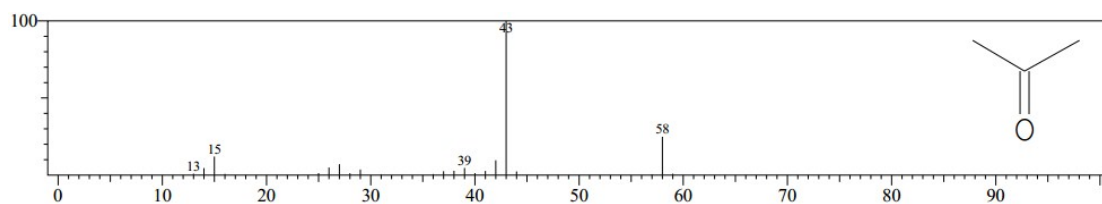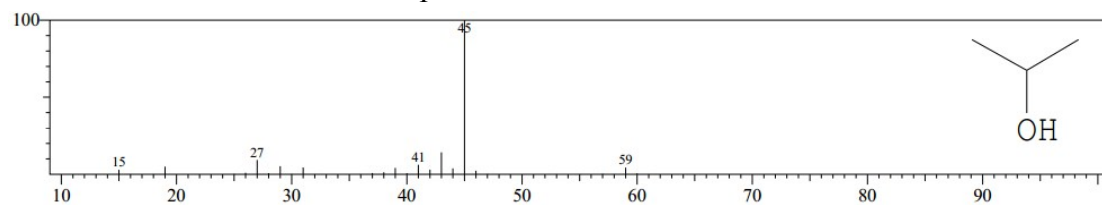

Fig. S19 Gas Chromatography–Mass Spectrometry (GC-MS) analysis for OCN-500 photocatalytic generation of  $\text{H}_2\text{O}_2$  with 10% isopropyl alcohol under visible light irradiation.

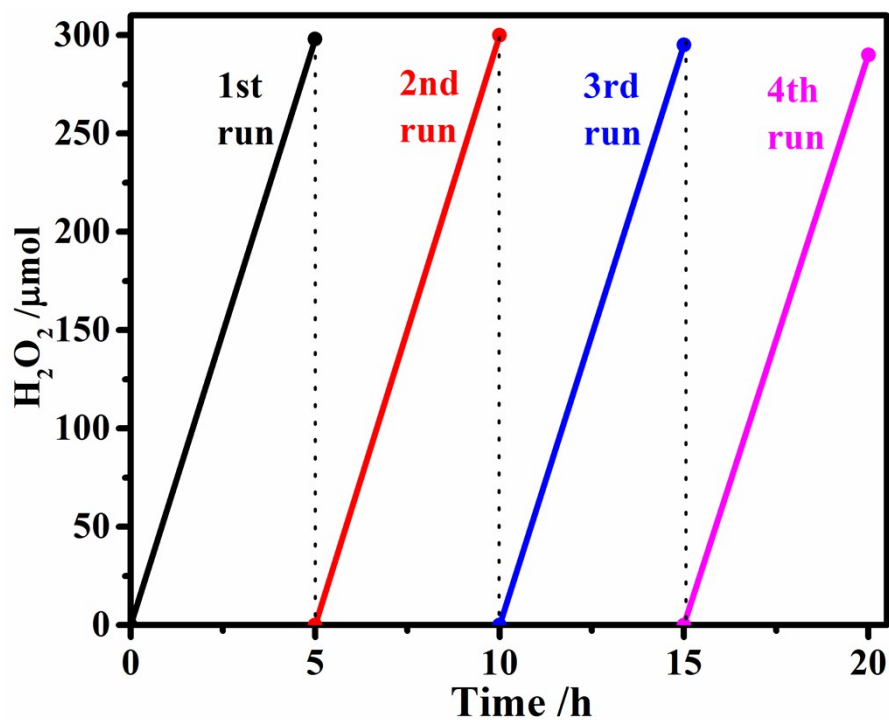

Fig. S20 The photocatalytic generation of  $\text{H}_2\text{O}_2$  by OCN-500 for four times with 10% isopropyl alcohol under visible light irradiation.

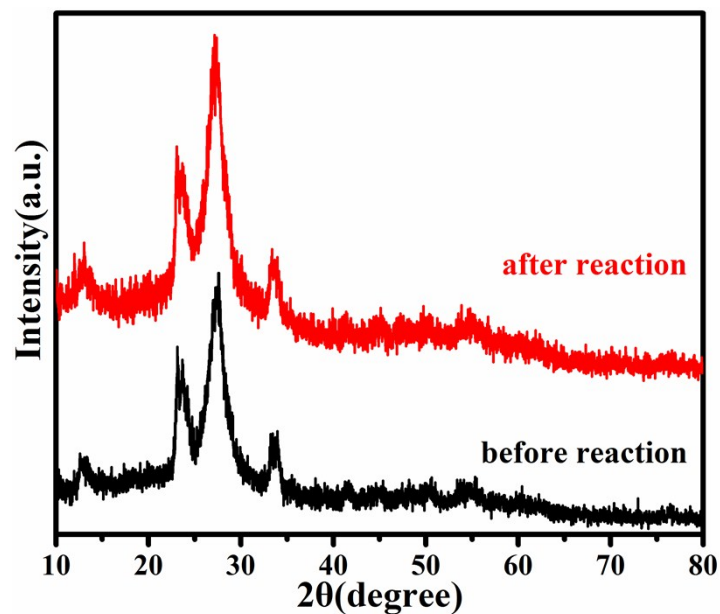

Fig. S21 XRD patterns of OCN-500 after 4 cycles of the photocatalytic generation of  $\text{H}_2\text{O}_2$  with 10% isopropyl alcohol under visible light irradiation.

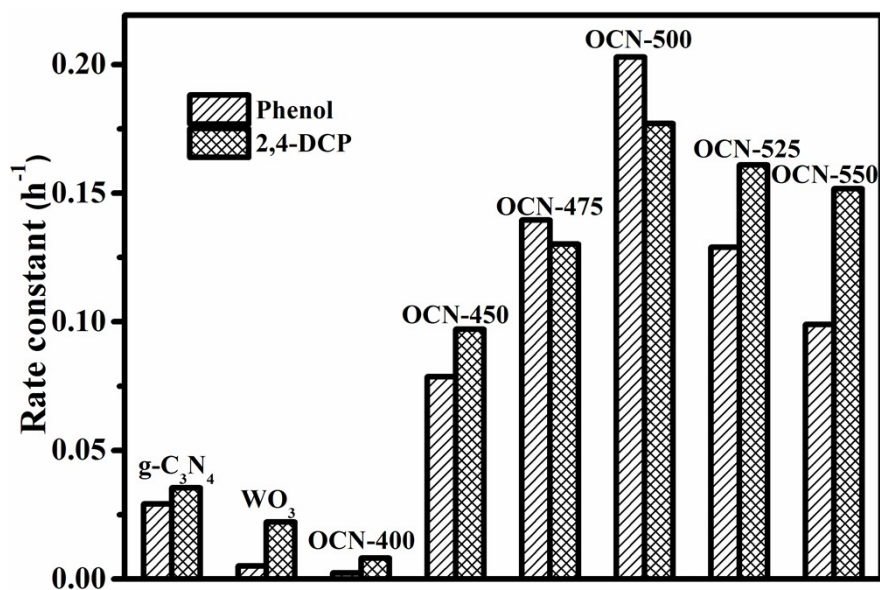

Fig. S22 Photocatalytic degradation of phenol and 2,4-DCP by different samples under visible light irradiation.

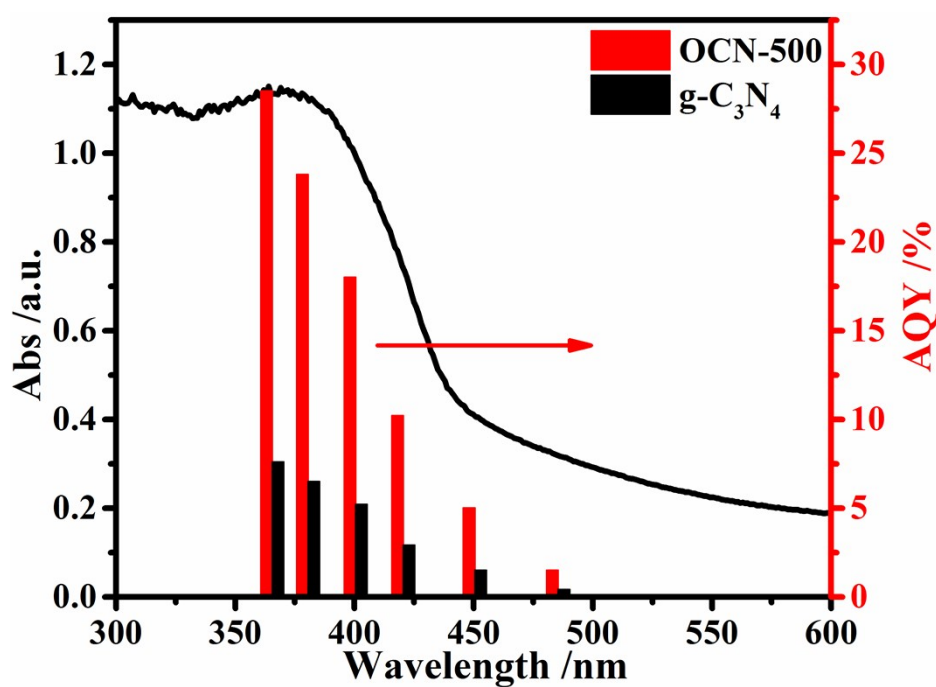

Fig. S23 Diffuse reflectance absorption spectra (left axis) of OCN-500 and apparent quantum yield (AQY, right axis) of  $\text{g-C}_3\text{N}_4$  and OCN-500 photocatalytic  $\text{H}_2\text{O}_2$  production with monochromatic light irradiation. The experimental conditions were as follows: 1 g/L of photocatalyst, 10 vol % of isopropyl alcohol, and  $\text{O}_2$ -saturated.

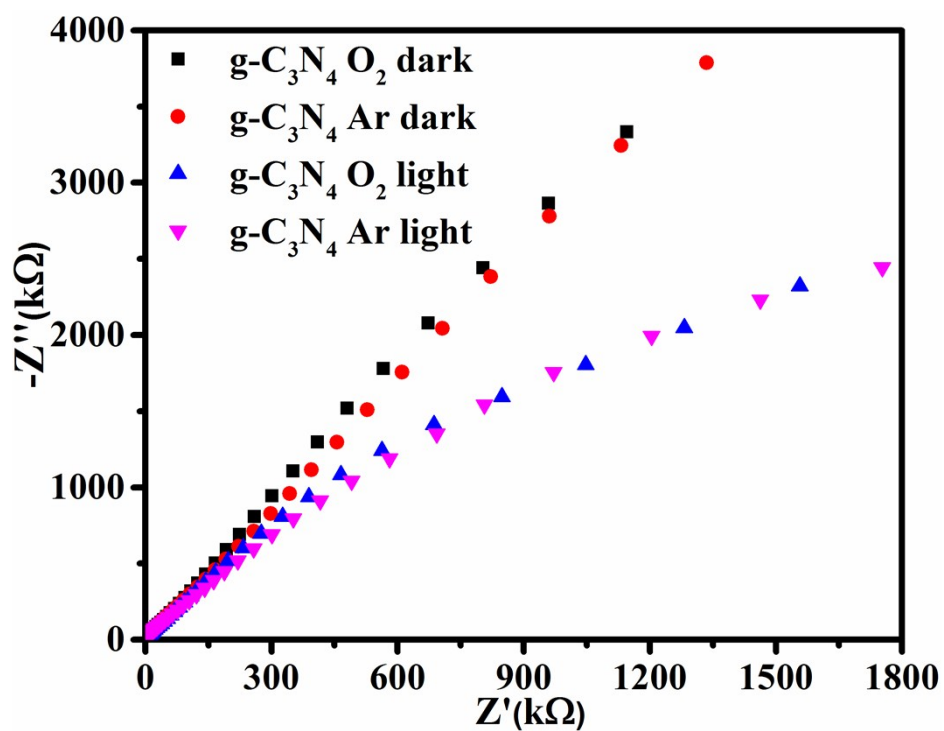

Fig. S24 Electrochemical impedance spectroscopy Nyquist plots of  $g\text{-C}_3\text{N}_4$  with saturated Ar or  $\text{O}_2$  atmosphere.

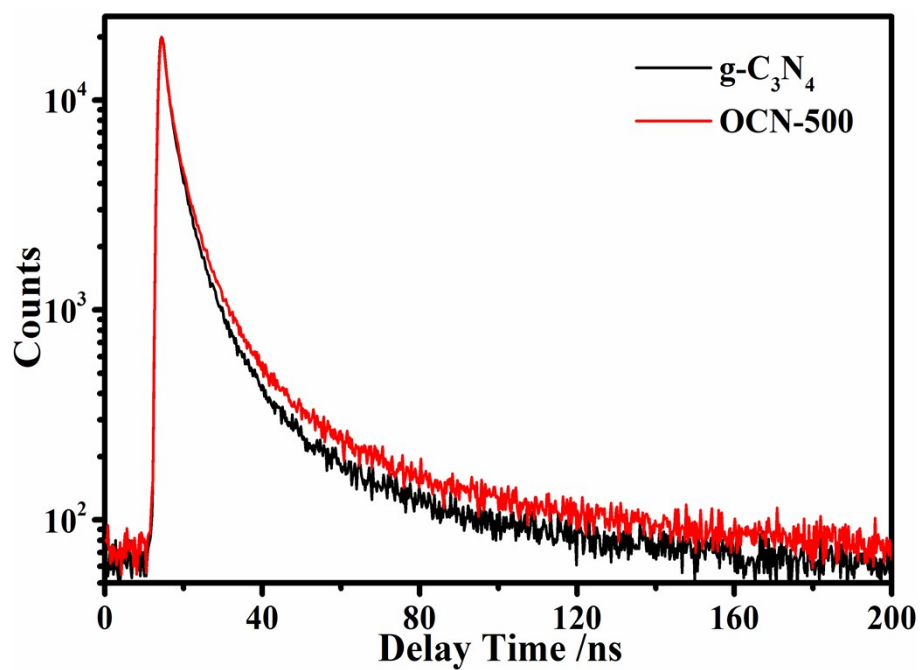

Fig. S25. Room temperature time-resolved transient photoluminescence decays spectroscopy for OCN-500 and  $g\text{-C}_3\text{N}_4$ , excited at 360 nm.

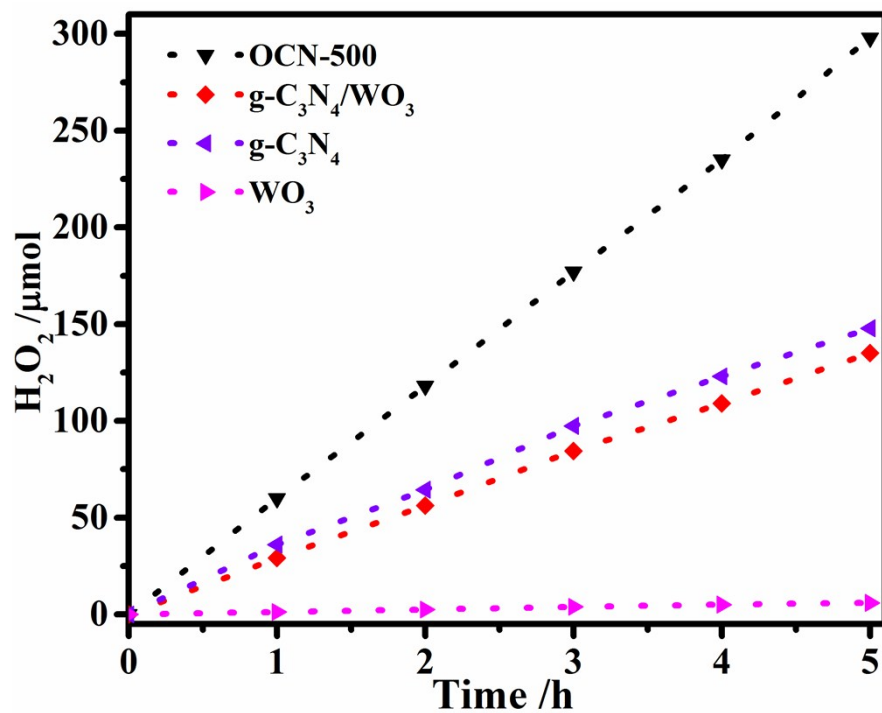

Fig. S26. The photocatalytic generation of  $H_2O_2$  with 10% isopropyl alcohol under visible light irradiation. ( $g\text{-C}_3\text{N}_4/\text{WO}_3$ :  $g\text{-C}_3\text{N}_4$  and  $\text{WO}_3$  are ground and mixed according to the ratio of carbon nitride and tungsten in OCN-500)

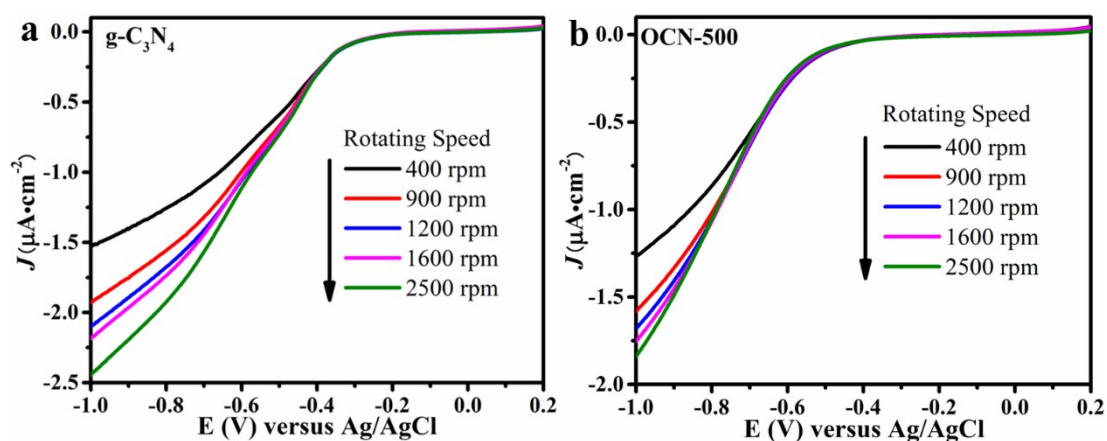

Fig. S27. LSV curves of  $\text{g-C}_3\text{N}_4$  (a) and OCN-500 (b) measured on RDE analysis at different rotating speeds.

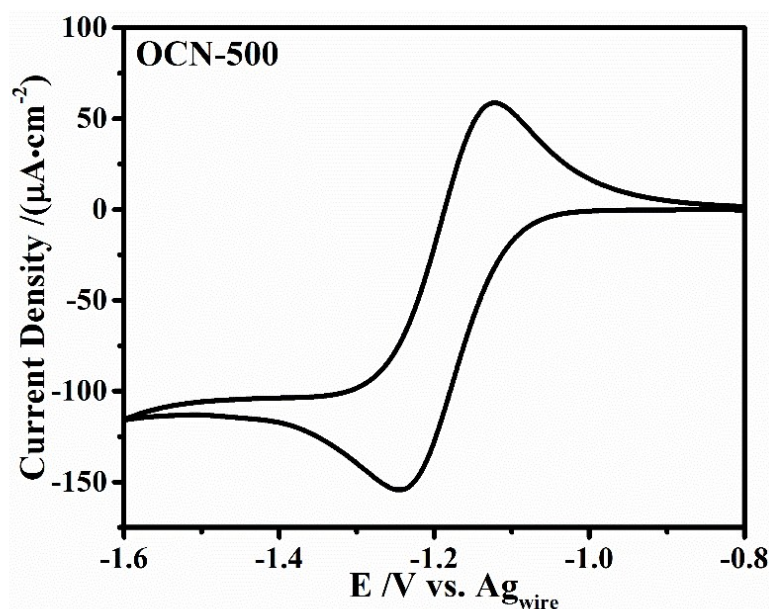

Fig. 28 Cyclic voltammetry for OCN-500 in acetonitrile solution. Experiment conditions: 0.1 M TBAP (tetra-*n*-butylammonium perchlorate), scan rates 10 mV/s, A silver wire was used as a reference electrode. All solutions were thoroughly degassed with  $\text{N}_2$  before each experiment, and an inert atmosphere was maintained during the experiments.

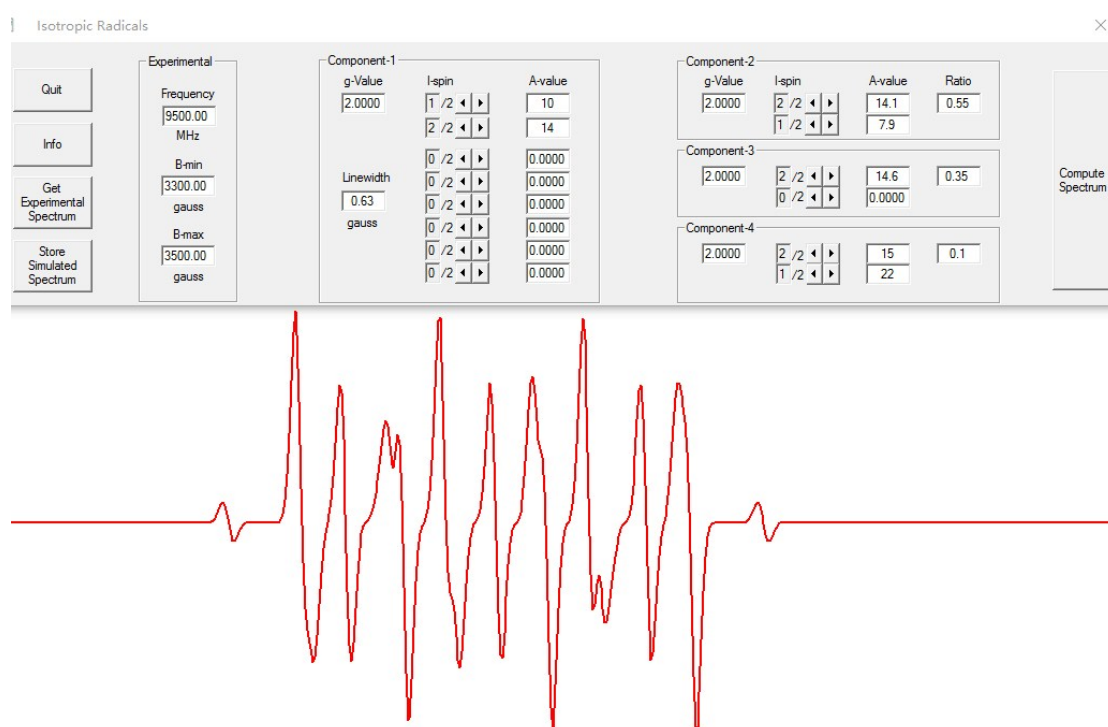

Fig. S29. The simulation ESR spectra of OCN-500 under visible light irradiation by the “Isotropic Radicals” software.

The simulation were performed by “Isotropic Radicals” software. In Fig. S29, A-value represents hyperfine splitting constants. The type of free radicals were judged from the A-value.

In component-1,  $A_N=14$ ,  $A_H=10$  attributed to  $\text{ROO}\cdot$ ;

In component-2,  $A_N=14.1$ ,  $A_H=7.9$  attributed to  $\text{RO}\cdot$ ;

In component-3,  $A_N=14.6$ ,  $A_H=10$  attributed to  $\text{RN}\cdot$ ;

In component-4,  $A_N=15$ ,  $A_H=22$  attributed to  $\text{R}\cdot$ .

Table S4. A detailed comparison of photocatalytic H<sub>2</sub>O<sub>2</sub> production by different photocatalysts

| Catalyst                                                | Conditions                                                                                                                                       | Formed H <sub>2</sub> O <sub>2</sub>                  | Ref.      |
|---------------------------------------------------------|--------------------------------------------------------------------------------------------------------------------------------------------------|-------------------------------------------------------|-----------|
| OCN-500                                                 | O <sub>2</sub> ; 1 g/L (catalyst), 10 vol % of 2-propanol, in water (pH=7); Xe-lamp $\lambda \geq 420\text{nm}$ , 35.2 mW/cm <sup>2</sup> ; 298K | 730 $\mu\text{mol}$ for 5h                            | This work |
| OCN-500                                                 | O <sub>2</sub> ; 1 g/L, in the pure water; Xe-lamp $\lambda \geq 420\text{nm}$ , 35.2 mW/cm <sup>2</sup> ; 298K                                  | 53 $\mu\text{mol}$ for 10h                            | This work |
| g-C <sub>3</sub> N <sub>4</sub> /PDI                    | O <sub>2</sub> ; 1.67g/L; in the pure water; 420–500 nm, 43.3 W/m <sup>2</sup> ; 298K                                                            | 14 $\mu\text{mol}$ for 24h                            | 1         |
| g-C <sub>3</sub> N <sub>4</sub> /PDI/rGO0.05            | O <sub>2</sub> ; 1.67g/L; in the pure water; Xe-lamp 420–500 nm, 43.3 W/m <sup>2</sup> ; 298K                                                    | 29 $\mu\text{mol}$ for 24h                            | 1         |
| g-C <sub>3</sub> N <sub>4</sub> /PDI/rGO0.05            | O <sub>2</sub> ; 1.67g/L; 90 vol % of 2-propanol; Xe-lamp 420–500 nm, 43.3 W/m <sup>2</sup> ; 298K                                               | 400 $\mu\text{mol}$ for 6h                            | 1         |
| g-C <sub>3</sub> N <sub>4</sub> /PDI51                  | O <sub>2</sub> ; 1.67g/L; in the pure water; Xe-lamp 420–500 nm, 26.9 W/m <sup>2</sup> ; 298K                                                    | 50.6 $\mu\text{mol}$ for 48h                          | 7         |
| g-C <sub>3</sub> N <sub>4</sub>                         | O <sub>2</sub> ; 1.67g/L; 90 vol % of 2-propanol, Xe-lamp 420–500 nm, 26.9 W/m <sup>2</sup> ; 298K                                               | 148 $\mu\text{mol}$ for 6h                            | 7         |
| g-C <sub>3</sub> N <sub>4</sub> /PDI51                  | O <sub>2</sub> ; 1.67g/L; 90 vol % of 2-propanol, 420–500 nm, 26.9 W/m <sup>2</sup> ; 298K                                                       | 210 $\mu\text{mol}$ for 6h                            | 7         |
| g-C <sub>3</sub> N <sub>4</sub>                         | O <sub>2</sub> ; 4g/L, 90 vol % of ethanol, Xe-lamp 420–500 nm, 26.9 W/m <sup>2</sup> ; 298K                                                     | 30 $\mu\text{mol}$ for 12h                            | 8         |
| Mesoporous g-C <sub>3</sub> N <sub>4</sub>              | O <sub>2</sub> ; 4g/L, 90 vol % of ethanol, Xe-lamp 420–500 nm, 26.9 W/m <sup>2</sup> ; 298K                                                     | 92 $\mu\text{mol}$ for 24h                            | 9         |
| CdS-graphene oxide                                      | O <sub>2</sub> -saturated; 0.5 g/L; 5 vol % of methanol, pH = 4.0; $\lambda_{\text{ex}}$ = 635 nm, 23 mW/cm <sup>2</sup>                         | 95 $\mu\text{M}$ for 1h, without longer reaction      | 10        |
| reduced graphene oxide–TiO <sub>2</sub>                 | O <sub>2</sub> -saturated; 0.5 g/L, 0.1 M phosphate buffer, 5 vol% 2-propanol, pH=3.0, $\lambda \geq 320\text{ nm}$                              | 4.8 mM for 3h                                         | 11        |
| CoP decorated g-C <sub>3</sub> N <sub>4</sub> (50Co/CN) | O <sub>2</sub> -saturated; 1g/L; 10 vol % of ethanol; Xe-lamp $\lambda \geq 420\text{nm}$                                                        | 140 $\mu\text{M}$ for 2h                              | 12        |
| g-C <sub>3</sub> N <sub>4</sub>                         | O <sub>2</sub> -saturated; 1g/L; 10 vol % of ethanol; Xe-lamp $\lambda \geq 420\text{nm}$                                                        | 30 $\mu\text{M}$ for 2h                               | 12        |
| CoP decorated g-C <sub>3</sub> N <sub>4</sub> (50Co/CN) | Air; 1g/L; 10 vol % of ethanol; Xe-lamp $\lambda \geq 420\text{nm}$                                                                              | 38 $\mu\text{M}$ for 2h                               | 12        |
| g-C <sub>3</sub> N <sub>4</sub>                         | Air; 1g/L catalyst; 10 vol % of ethanol; Xe-lamp $\lambda \geq 420\text{nm}$                                                                     | 10 $\mu\text{M}$ for 2h                               | 12        |
| 3DOM g-C <sub>3</sub> N <sub>4</sub> -PW <sub>11</sub>  | O <sub>2</sub> -saturated; 1 g/L; in the pure water; $\lambda \geq 320\text{ nm}$ ; 298K                                                         | 35 $\mu\text{mol}$ for 1h; 144 $\mu\text{mol}$ for 6h | 13        |
| 3DOM g-C <sub>3</sub> N <sub>4</sub>                    | O <sub>2</sub> -saturated; 1 g/L; in the pure water; $\lambda \geq$                                                                              | 13 $\mu\text{mol}$ for 1h;                            | 13        |

|                                               |                                                                                                                       |                                                  |    |
|-----------------------------------------------|-----------------------------------------------------------------------------------------------------------------------|--------------------------------------------------|----|
|                                               | 320 nm;298K                                                                                                           | 23 $\mu$ mol for 6h                              |    |
| melam/ $\text{WO}_3$                          | Air; 1g/L; in the pure water; 435 nm LED;<br>3.0 mW/cm <sup>2</sup>                                                   | 19 $\mu$ M for 6h                                | 5  |
| Pt- $\text{WO}_3$                             | Air; 1.30 g/L; 0.43 mM phenol aqueous<br>solution; Xe-lamp $\lambda \geq 420\text{nm}$ , 25.2<br>mW/cm <sup>2</sup> ; | 23 $\mu$ M for 1h,<br>without longer<br>reaction | 14 |
| $\text{Bi}_2\text{WO}_6$                      | Air; 1.30 g/L; 0.43 mM phenol aqueous<br>solution; Xe-lamp $\lambda \geq 420\text{nm}$ , 25.2<br>mW/cm <sup>2</sup> ; | 8 $\mu$ M for 1h,<br>without longer<br>reaction  | 14 |
| $\text{Au}_{0.1}\text{Ag}_{0.4}/\text{TiO}_2$ | $\text{O}_2$ ; 1g/L, 4 vol % of ethanol; Hg lamp, $\lambda$<br>> <b>280 nm</b> , 13.8 mW/cm <sup>2</sup> ; 298K       | 3.6 mM for 12<br>h                               | 15 |

# Cartesian Coordinates (in Å)

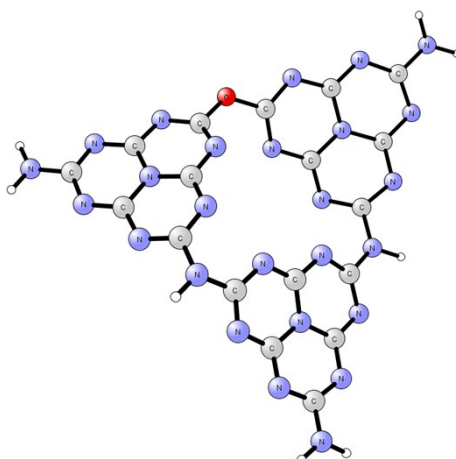

| 1. (C-O-C) |           |           |           | a1 | (53 atoms) |           |           |
|------------|-----------|-----------|-----------|----|------------|-----------|-----------|
| N          | -3.329219 | 3.018381  | 0.587859  | C  | 6.331421   | -1.488857 | 0.436987  |
| C          | -2.732063 | 1.916256  | 1.066905  | H  | 1.410164   | -4.656782 | -0.834511 |
| N          | -3.596848 | 0.839842  | 1.246896  | N  | -5.006632  | -3.391977 | 0.028079  |
| N          | -1.441257 | 1.743478  | 1.345957  | C  | -4.598503  | -4.593913 | -0.43176  |
| C          | -0.60971  | 2.626805  | 0.8104    | N  | -3.338545  | -5.00466  | -0.695048 |
| N          | 0.707809  | 2.435971  | 0.827007  | C  | -2.37063   | -4.141674 | -0.428823 |
| N          | -1.127251 | 3.759244  | 0.161299  | N  | -1.08749   | -4.409896 | -0.700154 |
| C          | -2.519819 | 3.990851  | 0.164401  | N  | -2.705544  | -2.886061 | 0.122673  |
| N          | -2.984907 | 5.141937  | -0.298096 | C  | -4.055138  | -2.512684 | 0.304492  |
| C          | -2.071654 | 6.003178  | -0.791428 | N  | -4.333838  | -1.273049 | 0.718393  |
| N          | -0.73962  | 5.815848  | -0.926307 | C  | -3.279491  | -0.494258 | 1.014951  |
| C          | -0.256098 | 4.681411  | -0.451881 | N  | -1.997969  | -0.838401 | 1.057835  |
| N          | 1.040275  | 4.361521  | -0.563594 | C  | -1.688012  | -2.016993 | 0.538941  |
| C          | 1.411925  | 3.245894  | 0.04569   | N  | -0.423633  | -2.366671 | 0.372508  |
| N          | 1.726886  | -1.475564 | -0.948018 | C  | -0.201692  | -3.475537 | -0.332496 |
| C          | 2.107201  | -2.723214 | -0.656831 | H  | -4.569786  | 1.062545  | 1.06529   |
| N          | 1.11692   | -3.69772  | -0.696411 | N  | 7.610302   | -1.804738 | 0.702866  |
| N          | 3.333203  | -3.158945 | -0.351421 | H  | 7.892178   | -2.772892 | 0.706498  |
| C          | 4.256926  | -2.215878 | -0.138942 | H  | 8.258811   | -1.074214 | 0.953489  |
| N          | 5.511316  | -2.522153 | 0.152125  | N  | -5.570028  | -5.49302  | -0.669312 |
| N          | 3.866783  | -0.860143 | -0.177463 | H  | -5.32764   | -6.398484 | -1.040778 |
| C          | 2.585145  | -0.515472 | -0.639802 | H  | -6.532705  | -5.23435  | -0.517739 |
| N          | 2.254257  | 0.771875  | -0.733521 | N  | -2.543119  | 7.187518  | -1.217294 |
| C          | 3.117701  | 1.628428  | -0.201491 | H  | -3.533531  | 7.372095  | -1.17487  |
| N          | 4.352217  | 1.419107  | 0.231821  | H  | -1.907511  | 7.855332  | -1.62597  |
| C          | 4.778869  | 0.150859  | 0.187926  | O  | 2.732516   | 2.938007  | -0.131208 |
| N          | 6.021876  | -0.175794 | 0.497725  |    |            |           |           |

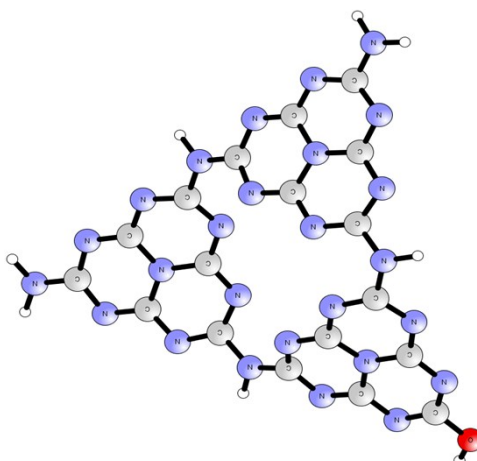

| 2. (-OH) a2 ( 53 atoms) |           |           |           |   |           |           |           |
|-------------------------|-----------|-----------|-----------|---|-----------|-----------|-----------|
| N                       | -3.829114 | 2.507837  | 0.413546  | N | 4.167587  | 2.078623  | -0.044956 |
| C                       | -3.087247 | 1.465547  | 0.836836  | C | 4.781323  | 0.88943   | -0.025493 |
| N                       | -3.7905   | 0.274528  | 0.949285  | N | 6.092248  | 0.78467   | 0.124814  |
| N                       | -1.787763 | 1.456806  | 1.113116  | C | 6.593345  | -0.468483 | 0.173872  |
| C                       | -1.086969 | 2.493537  | 0.677493  | H | 2.159153  | -4.463724 | -0.324401 |
| N                       | 0.237317  | 2.479761  | 0.701501  | N | -4.419629 | -4.141272 | -0.267488 |
| N                       | -1.753867 | 3.604425  | 0.135777  | C | -3.789488 | -5.286769 | -0.604316 |
| C                       | -3.16529  | 3.618741  | 0.104279  | N | -2.460429 | -5.520563 | -0.67099  |
| N                       | -3.788981 | 4.735177  | -0.267215 | C | -1.669369 | -4.521844 | -0.311463 |
| C                       | -3.002119 | 5.754596  | -0.607332 | N | -0.336448 | -4.604198 | -0.401119 |
| N                       | -1.663117 | 5.810318  | -0.676315 | N | -2.247835 | -3.315316 | 0.136604  |
| C                       | -1.007487 | 4.709827  | -0.312596 | C | -3.646903 | -3.130363 | 0.100736  |
| N                       | 0.318538  | 4.612232  | -0.399429 | N | -4.146419 | -1.928796 | 0.404834  |
| C                       | 0.852267  | 3.461716  | 0.045136  | C | -3.264124 | -1.010786 | 0.833667  |
| N                       | 2.205082  | 3.288809  | -0.187482 | N | -1.977708 | -1.183774 | 1.112546  |
| O                       | -3.644775 | 6.873706  | -0.93941  | C | -1.430987 | -2.311681 | 0.677566  |
| H                       | -2.957623 | 7.525086  | -1.17198  | N | -0.118612 | -2.483354 | 0.703535  |
| N                       | 1.916633  | -1.291893 | -0.564945 | C | 0.349142  | -3.544842 | 0.046266  |
| C                       | 2.525511  | -2.43818  | -0.257343 | H | 2.765966  | 4.116308  | -0.346861 |
| N                       | 1.718447  | -3.564093 | -0.179133 | H | -4.768668 | 0.345301  | 0.689943  |
| N                       | 3.832269  | -2.645549 | -0.049516 | N | 7.929067  | -0.562719 | 0.297751  |
| C                       | 4.607182  | -1.555963 | -0.028728 | H | 8.35679   | -1.472672 | 0.373763  |
| N                       | 5.920679  | -1.637316 | 0.120466  | H | 8.48001   | 0.278112  | 0.376467  |
| N                       | 4.004423  | -0.283781 | -0.134175 | N | -4.58447  | -6.322147 | -0.92771  |
| C                       | 2.635265  | -0.187253 | -0.432948 | H | -4.169469 | -7.193383 | -1.219864 |
| N                       | 2.081437  | 1.010524  | -0.567756 | H | -5.58508  | -6.197755 | -0.927238 |
| C                       | 2.84683   | 2.056187  | -0.259531 |   |           |           |           |

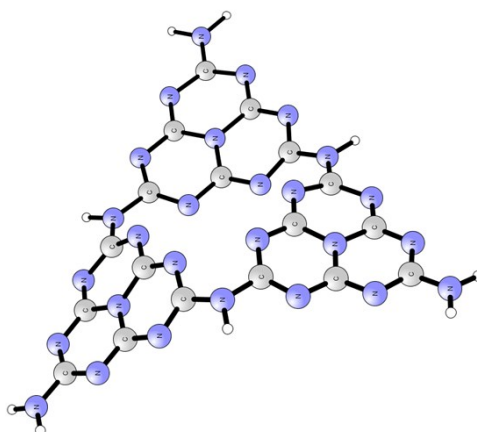

| 3. (-NH <sub>2</sub> ) |           |           |           | a3 (54 atoms) |           |           |           |
|------------------------|-----------|-----------|-----------|---------------|-----------|-----------|-----------|
| N                      | -3.994298 | 2.223066  | 0.408662  | C             | 6.614694  | -0.002419 | 0.162702  |
| C                      | -3.180347 | 1.243277  | 0.840132  | H             | 2.472354  | -4.300826 | -0.325076 |
| N                      | -3.796963 | 0.001396  | 0.957276  | N             | -4.112037 | -4.444068 | -0.270866 |
| N                      | -1.884751 | 1.326722  | 1.121169  | C             | -3.402131 | -5.540021 | -0.611665 |
| C                      | -1.259199 | 2.411406  | 0.683955  | N             | -2.060011 | -5.679787 | -0.677919 |
| N                      | 0.062481  | 2.490809  | 0.712592  | C             | -1.341451 | -4.628749 | -0.313763 |
| N                      | -2.001587 | 3.469325  | 0.137947  | N             | -0.006303 | -4.616931 | -0.402337 |
| C                      | -3.410168 | 3.383793  | 0.101213  | N             | -2.004058 | -3.46791  | 0.137769  |
| N                      | -4.108759 | 4.446793  | -0.271774 | C             | -3.412595 | -3.381454 | 0.101683  |
| C                      | -3.397982 | 5.542182  | -0.612595 | N             | -3.995901 | -2.220313 | 0.40916   |
| N                      | -2.055792 | 5.680881  | -0.678811 | C             | -3.18107  | -1.240741 | 0.839517  |
| C                      | -1.338059 | 4.62946   | -0.314028 | N             | -1.885279 | -1.324703 | 1.11939   |
| N                      | -0.002945 | 4.616699  | -0.402234 | C             | -1.260745 | -2.410202 | 0.682908  |
| C                      | 0.605258  | 3.5129    | 0.051397  | N             | 0.060832  | -2.490473 | 0.71115   |
| N                      | 2.005453  | -1.154611 | -0.55833  | C             | 0.602761  | -3.513278 | 0.050393  |
| C                      | 2.694802  | -2.254274 | -0.25377  | H             | -4.775911 | 0.00176   | 0.692267  |
| N                      | 1.969783  | -3.435193 | -0.174824 | N             | 7.954897  | -0.002908 | 0.281122  |
| N                      | 4.013875  | -2.369376 | -0.049424 | H             | 8.444784  | -0.880603 | 0.359672  |
| C                      | 4.709719  | -1.227704 | -0.031294 | H             | 8.445352  | 0.874403  | 0.360425  |
| N                      | 6.026528  | -1.216217 | 0.112657  | N             | -4.121641 | -6.628371 | -0.940427 |
| N                      | 4.018389  | -0.001411 | -0.134076 | H             | -3.645382 | -7.466681 | -1.235123 |
| C                      | 2.644178  | -0.000847 | -0.427124 | H             | -5.128457 | -6.57555  | -0.939964 |
| N                      | 2.006222  | 1.15349   | -0.557599 | N             | -4.116653 | 6.631176  | -0.941201 |
| C                      | 2.696426  | 2.252441  | -0.252544 | H             | -5.123445 | 6.577872  | -0.944523 |
| N                      | 4.015568  | 2.366492  | -0.047711 | H             | -3.639737 | 7.467831  | -1.239544 |
| C                      | 4.710556  | 1.224316  | -0.030218 | N             | 1.972325  | 3.43392   | -0.173406 |
| N                      | 6.027335  | 1.211803  | 0.114034  | H             | 2.475582  | 4.299179  | -0.323454 |

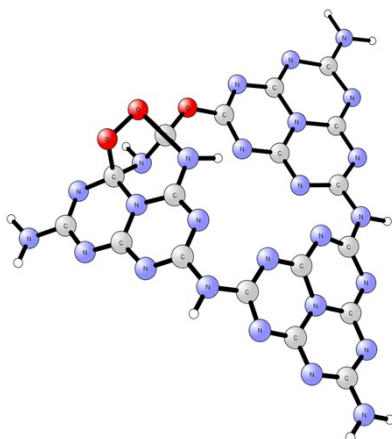

| (4) (C-O-C) e1 (57 atoms ) |           |           |           |   |           |           |           |  |  |  |  |
|----------------------------|-----------|-----------|-----------|---|-----------|-----------|-----------|--|--|--|--|
| N                          | 0.229881  | -4.383577 | -0.163192 | N | -5.939324 | -1.995851 | 0.316686  |  |  |  |  |
| C                          | -0.339168 | -3.344253 | -0.759176 | C | -6.65933  | -0.907281 | 0.656297  |  |  |  |  |
| N                          | -1.72834  | -3.450054 | -0.89222  | N | -6.254239 | 0.383391  | 0.697814  |  |  |  |  |
| N                          | 0.247934  | -2.215252 | -1.194608 | C | -5.021016 | 0.62222   | 0.285919  |  |  |  |  |
| C                          | 1.51247   | -2.095111 | -0.853508 | N | -4.469102 | 1.841802  | 0.35157   |  |  |  |  |
| N                          | 2.183775  | -0.956348 | -1.156101 | N | -4.234432 | -0.447303 | -0.188883 |  |  |  |  |
| N                          | 2.188289  | -3.066327 | -0.181746 | C | -4.698774 | -1.777367 | -0.097168 |  |  |  |  |
| C                          | 1.537487  | -4.255625 | 0.170619  | N | -3.859409 | -2.771013 | -0.389806 |  |  |  |  |
| N                          | 2.172578  | -5.173336 | 0.85296   | C | -2.644938 | -2.414964 | -0.84613  |  |  |  |  |
| C                          | 3.428106  | -4.832005 | 1.298464  | N | -2.241614 | -1.196148 | -1.208617 |  |  |  |  |
| N                          | 4.089844  | -3.699984 | 1.143171  | C | -3.000686 | -0.190892 | -0.803088 |  |  |  |  |
| C                          | 3.561545  | -2.761793 | 0.291082  | N | -2.578498 | 1.065088  | -0.90668  |  |  |  |  |
| N                          | 3.505945  | -1.380973 | 0.768315  | C | -3.251104 | 1.958292  | -0.188358 |  |  |  |  |
| C                          | 3.463874  | -0.685778 | -0.49872  | H | -2.091911 | -4.326116 | -0.531667 |  |  |  |  |
| N                          | -0.478002 | 2.267295  | 0.135149  | N | 2.850452  | 7.382966  | 0.507231  |  |  |  |  |
| C                          | -1.245489 | 3.365368  | 0.120855  | H | 2.228827  | 8.17113   | 0.605753  |  |  |  |  |
| N                          | -2.60922  | 3.177035  | 0.037882  | H | 3.850873  | 7.510479  | 0.486153  |  |  |  |  |
| N                          | -0.84106  | 4.639238  | 0.215509  | N | -7.934986 | -1.131436 | 1.016943  |  |  |  |  |
| C                          | 0.479054  | 4.84679   | 0.254313  | H | -8.508132 | -0.358744 | 1.318831  |  |  |  |  |
| N                          | 0.992283  | 6.05979   | 0.379171  | H | -8.283522 | -2.077329 | 1.043265  |  |  |  |  |
| N                          | 1.354248  | 3.742294  | 0.133911  | N | 4.012074  | -5.796475 | 2.051615  |  |  |  |  |
| C                          | 0.822016  | 2.452618  | 0.082846  | H | 3.567262  | -6.699557 | 2.097724  |  |  |  |  |
| N                          | 1.65361   | 1.412766  | -0.04193  | H | 4.983993  | -5.697572 | 2.299852  |  |  |  |  |
| C                          | 2.946178  | 1.690465  | -0.154684 | O | 3.805877  | 0.672174  | -0.422137 |  |  |  |  |
| N                          | 3.552344  | 2.867043  | -0.070745 | O | 4.515893  | -1.243056 | -1.275367 |  |  |  |  |
| C                          | 2.75456   | 3.931535  | 0.09463   | O | 4.40832   | -2.672504 | -0.937343 |  |  |  |  |
| N                          | 3.24012   | 5.152445  | 0.212942  | H | 4.400942  | -1.181807 | 1.218756  |  |  |  |  |
| C                          | 2.338929  | 6.150484  | 0.362975  | H | 1.562161  | -0.158066 | -1.264389 |  |  |  |  |
| H                          | -3.189573 | 3.958927  | 0.317073  |   |           |           |           |  |  |  |  |

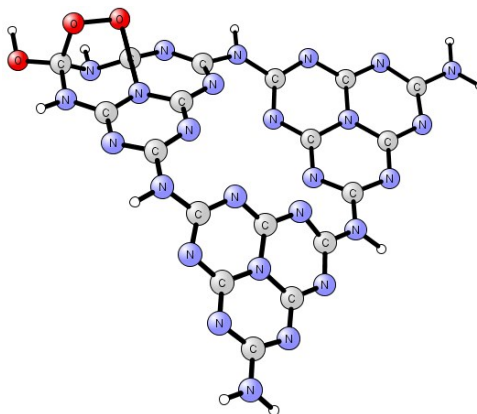

| (5) (-OH) e2 (57 atoms) |           |           |           |   |           |           |           |  |  |
|-------------------------|-----------|-----------|-----------|---|-----------|-----------|-----------|--|--|
| N                       | 3.366491  | -2.674282 | -0.312543 | N | -1.839536 | 5.939716  | -0.084954 |  |  |
| C                       | 2.126577  | -2.351076 | -0.795668 | C | -3.186275 | 5.946351  | -0.138959 |  |  |
| N                       | 1.286287  | -3.449518 | -0.931632 | H | -5.286783 | 0.359243  | 0.327744  |  |  |
| N                       | 1.67549   | -1.154288 | -1.091553 | N | -2.602722 | -5.649503 | 0.255719  |  |  |
| C                       | 2.398186  | -0.104788 | -0.662955 | C | -3.902129 | -5.479662 | 0.580339  |  |  |
| N                       | 1.920203  | 1.112283  | -0.713219 | N | -4.605111 | -4.328338 | 0.640172  |  |  |
| N                       | 3.655268  | -0.343758 | -0.101775 | C | -3.960443 | -3.226646 | 0.285252  |  |  |
| C                       | 4.115035  | -1.634734 | -0.014706 | N | -4.522338 | -2.016441 | 0.37255   |  |  |
| N                       | 5.389494  | -1.775066 | 0.421146  | N | -2.623107 | -3.326733 | -0.153976 |  |  |
| C                       | 6.196328  | -0.589828 | 0.641741  | C | -1.940689 | -4.561038 | -0.109323 |  |  |
| N                       | 5.359045  | 0.363474  | 1.336928  | N | -0.637434 | -4.587333 | -0.401279 |  |  |
| C                       | 4.523749  | 0.817673  | 0.244459  | C | -0.103325 | -3.430746 | -0.831453 |  |  |
| N                       | 3.821882  | 1.996949  | 0.475842  | N | -0.730788 | -2.299094 | -1.122686 |  |  |
| C                       | 2.607067  | 2.05217   | -0.020081 | C | -1.983917 | -2.200189 | -0.693918 |  |  |
| N                       | 1.910569  | 3.247489  | 0.183167  | N | -2.621013 | -1.042017 | -0.724252 |  |  |
| O                       | 7.355344  | -0.98293  | 1.254925  | C | -3.781421 | -0.990205 | -0.068021 |  |  |
| H                       | 8.041545  | -0.340763 | 1.004128  | H | 2.455679  | 4.091694  | 0.300104  |  |  |
| N                       | -2.243532 | 1.284016  | 0.545923  | H | 1.702103  | -4.330802 | -0.652182 |  |  |
| C                       | -3.531285 | 1.437736  | 0.245219  | N | -3.766522 | 7.156294  | -0.248185 |  |  |
| N                       | -4.291267 | 0.275359  | 0.165482  | H | -4.768836 | 7.217914  | -0.336754 |  |  |
| N                       | -4.203747 | 2.578418  | 0.045071  | H | -3.186905 | 7.977454  | -0.32601  |  |  |
| C                       | -3.471806 | 3.698131  | 0.03532   | N | -4.579492 | -6.598066 | 0.89832   |  |  |
| N                       | -4.029102 | 4.891701  | -0.100793 | H | -5.543573 | -6.528432 | 1.184941  |  |  |
| N                       | -2.068082 | 3.600419  | 0.139553  | H | -4.09791  | -7.483728 | 0.906203  |  |  |
| C                       | -1.473281 | 2.358349  | 0.421275  | O | 6.548018  | 0.044392  | -0.614747 |  |  |
| N                       | -0.158499 | 2.275526  | 0.550974  | O | 5.464746  | 1.01769   | -0.864551 |  |  |
| C                       | 0.53971   | 3.377188  | 0.261807  | H | 5.839615  | -2.67621  | 0.335995  |  |  |
| N                       | 0.067634  | 4.620537  | 0.072597  | H | 5.912634  | 1.158962  | 1.655328  |  |  |
| C                       | -1.259233 | 4.754189  | 0.049553  |   |           |           |           |  |  |

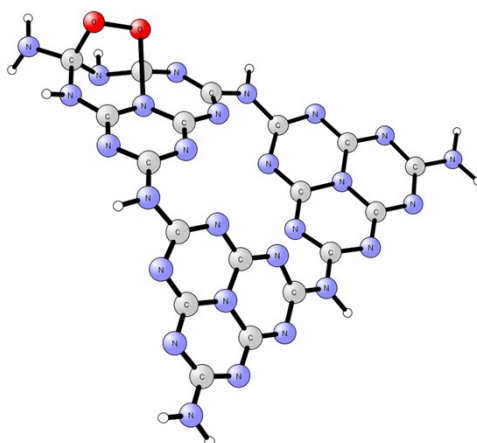

| 6. (-NH <sub>2</sub> ) e3 (58 atoms) |           |           |           |   |           |           |           |
|--------------------------------------|-----------|-----------|-----------|---|-----------|-----------|-----------|
| N                                    | 3.381945  | -2.645948 | -0.336582 | H | -5.285144 | 0.32079   | 0.350869  |
| C                                    | 2.137278  | -2.331625 | -0.814012 | N | -2.559977 | -5.669237 | 0.248531  |
| N                                    | 1.306758  | -3.437707 | -0.95559  | C | -3.858121 | -5.508752 | 0.58249   |
| N                                    | 1.672652  | -1.137947 | -1.098995 | N | -4.568362 | -4.362376 | 0.650619  |
| C                                    | 2.385487  | -0.084487 | -0.662559 | C | -3.933397 | -3.255289 | 0.294541  |
| N                                    | 1.903043  | 1.129952  | -0.717089 | N | -4.502955 | -2.049278 | 0.388618  |
| N                                    | 3.639148  | -0.317462 | -0.091465 | N | -2.598366 | -3.345358 | -0.153657 |
| C                                    | 4.116526  | -1.600758 | -0.021945 | C | -1.907317 | -4.575206 | -0.117463 |
| N                                    | 5.393565  | -1.735391 | 0.420664  | N | -0.605851 | -4.591999 | -0.41744  |
| C                                    | 6.21169   | -0.543142 | 0.632719  | C | -0.082014 | -3.430486 | -0.84775  |
| N                                    | 5.355125  | 0.408423  | 1.324597  | N | -0.719766 | -2.302752 | -1.132486 |
| C                                    | 4.512364  | 0.84531   | 0.230288  | C | -1.970057 | -2.212945 | -0.69423  |
| N                                    | 3.808553  | 2.028527  | 0.455022  | N | -2.614449 | -1.058482 | -0.715826 |
| C                                    | 2.590418  | 2.075302  | -0.030217 | C | -3.771586 | -1.016541 | -0.053317 |
| N                                    | 1.886783  | 3.267618  | 0.173965  | H | 2.426214  | 4.117164  | 0.277513  |
| N                                    | -2.249116 | 1.271323  | 0.557927  | H | 1.731834  | -4.316676 | -0.682965 |
| C                                    | -3.538652 | 1.41349   | 0.259641  | N | -3.823498 | 7.128051  | -0.253537 |
| N                                    | -4.289546 | 0.244562  | 0.185485  | H | -4.826403 | 7.180582  | -0.341046 |
| N                                    | -4.221267 | 2.547786  | 0.057485  | H | -3.251045 | 7.953681  | -0.336712 |
| C                                    | -3.498757 | 3.673552  | 0.041897  | N | -4.525879 | -6.632528 | 0.902339  |
| N                                    | -4.066506 | 4.86188   | -0.097103 | H | -4.039848 | -7.515748 | 0.899465  |
| N                                    | -2.094097 | 3.587931  | 0.142873  | O | 6.554934  | 0.08937   | -0.621079 |
| C                                    | -1.487958 | 2.35199   | 0.428095  | O | 5.442587  | 1.026997  | -0.884133 |
| N                                    | -0.172558 | 2.281096  | 0.555976  | H | 5.874274  | -2.596128 | 0.190511  |
| C                                    | 0.516249  | 3.387156  | 0.258813  | H | 5.903681  | 1.218313  | 1.615672  |
| N                                    | 0.032682  | 4.625895  | 0.066605  | N | 7.435753  | -0.942589 | 1.230823  |
| C                                    | -1.295067 | 4.748156  | 0.046919  | H | 8.100828  | -0.174892 | 1.231702  |
| N                                    | -1.885903 | 5.928433  | -0.09008  | H | 7.282937  | -1.27915  | 2.177698  |
| C                                    | -3.232591 | 5.923415  | -0.141194 | H | -5.489865 | -6.570698 | 1.190951  |

## References

1. Y. Kofuji, Y. Isobe, Y. Shiraishi, H. Sakamoto, S. Tanaka, S. Ichikawa and T. Hirai, *J. Am. Chem. Soc.*, 2016, **138**, 10019-10025.
2. X. Wei, T. Xie, D. Xu, Q. Zhao, S. Pang and D. Wang, *Nanotechnology*, 2008, **19**, 275707.
3. T. Jiang, T. Xie, L. Chen, Z. Fu and D. Wang, *Nanoscale*, 2013, **5**, 2938-2944.
4. O. Tomita, B. Ohtani and R. Abe, *Catal. Sci. Technol.*, 2014, **4**, 3850-3860.
5. Z. Jin, Q. Zhang, L. Hu, J. Chen, X. Cheng, Y.-J. Zeng, S. Ruan and T. Ohno, *Appl. Catal., B*, 2017, **205**, 569-575.
6. C. Kormann, D. W. Bahnemann and M. R. Hoffmann, *Environ. Sci. Technol.*, 1988, **22**, 798-806.
7. Y. Shiraishi, S. Kanazawa, Y. Kofuji, H. Sakamoto, S. Ichikawa, S. Tanaka and T. Hirai, *Angew. Chem. Int. Ed.*, 2014, **53**, 13454-13459.
8. Y. Shiraishi, S. Kanazawa, Y. Sugano, D. Tsukamoto, H. Sakamoto, S. Ichikawa and T. Hirai, *ACS Catal.*, 2014, **4**, 774-780.
9. Y. Shiraishi, Y. Kofuji, H. Sakamoto, S. Tanaka, S. Ichikawa and T. Hirai, *ACS Catal.*, 2015, **5**, 3058-3066.
10. H.-i. Kim, O. S. Kwon, S. Kim, W. Choi and J.-H. Kim, *Energy Environ. Sci.*, 2016, **9**, 1063-1073.
11. G.-h. Moon, W. Kim, A. D. Bokare, N.-e. Sung and W. Choi, *Energy Environ. Sci.*, 2014, **7**, 4023-4028.
12. Y. Peng, L. Wang, Y. Liu, H. Chen, J. Lei and J. Zhang, *Eur. J. Inorg. Chem.*, 2017, **2017**, 4797-4802.
13. S. Zhao, X. Zhao, H. Zhang, J. Li and Y. Zhu, *Nano Energy*, 2017, **35**, 405-414.
14. J. Sheng, X. Li and Y. Xu, *ACS Catal.*, 2014, **4**, 732-737.
15. D. Tsukamoto, A. Shiro, Y. Shiraishi, Y. Sugano, S. Ichikawa, S. Tanaka and T. Hirai, *ACS Catal.*, 2012, **2**, 599-603.
